1 **Annulment of antagonism shifts properties that are beneficial**  
2 **to plants in two-member consortia of *Bacillus velezensis***

3 Jiahui Shao<sup>1#</sup>, Yan Liu<sup>1#</sup>, Jiyu Xie<sup>1</sup>, Polonca Štefanič<sup>2</sup>, Yu Lv<sup>1</sup>, Ben Fan<sup>3</sup>, Ines Mandic-  
4 Mulec<sup>2</sup>, Ruifu Zhang<sup>1</sup>, Zhihui Xu<sup>1\*</sup>, Qirong Shen<sup>1</sup>

5 1 Jiangsu Provincial Key Lab of Solid Organic Waste Utilization, Jiangsu Collaborative  
6 Innovation Center of Solid Organic Wastes, Educational Ministry Engineering Center of  
7 Resource-Saving Fertilizers, The Key Laboratory of Plant Immunity, Nanjing  
8 Agricultural University, 210095 Nanjing, Jiangsu, Peoples R China

9 2 Biotechnical Faculty, University of Ljubljana, Ljubljana, Slovenia

10 3 Co-Innovation Center for Sustainable Forestry in Southern China, College of Forestry,  
11 Nanjing Forestry University, 210037, Nanjing, Peoples R China

12 J. Shao and Y. Liu contributed equally to this work

13 \*Corresponding authors: Zhihui Xu

14 College of Resources and Environmental Sciences, Nanjing Agricultural University,  
15 Nanjing, 210095, P.R. China.

16 E-mail: xzh2068@njau.edu.cn, Tel: 86-025-84396177, Fax: 86-025-84396260

17

18

19 **ABSTRACT**

20 *Bacillus* spp. strains that are beneficial to plants are widely used in commercial  
21 biofertilizers and biocontrol agents for sustainable agriculture. Generally, functional  
22 *Bacillus* strains are applied as single strain communities since the principles of synthetic  
23 microbial consortia constructed with *Bacillus* strains remain largely unclear. Here, we  
24 demonstrated that the mutual compatibility directly affects the survival and function of  
25 two-member consortia composed of *B. velezensis* SQR9 and FZB42 in the rhizosphere. A  
26 mutation in the global regulator Spo0A of SQR9 markedly reduced the boundary  
27 phenotype with wild-type FZB42, and the combined use of the SQR9 $\Delta$ *spo0A* mutant and  
28 FZB42 improved biofilm formation, root colonization and the production of secondary  
29 metabolites that are beneficial to plants. We further confirmed the correlation between  
30 the swarm discrimination phenotype between the two consortia members and the effects  
31 that are beneficial to plants in a greenhouse experiment. Our results provide evidence that  
32 social interactions among bacteria could be an influencing factor in achieving a desired  
33 community-level function.

34 **IMPORTANCE**

35 *Bacillus velezensis* is one of the most widely applied bacteria in biofertilizers in China  
36 and Europe. Additionally, the molecular mechanisms of plant growth promotion and  
37 disease suppression by representative model strains are well established, such as *B.*  
38 *velezensis* SQR9 and FZB42. However, it remains extremely challenging to design  
39 efficient consortia based on these model strains. Here, we showed that swarm  
40 discrimination phenotype is one of the major determinants affects the performance of

41 two-member *Bacillus* consortia in vitro and in the rhizosphere. Deletion in global  
42 regulatory gene *spo0A* of SQR9 reduced the strength of boundary formation with FZB42,  
43 result in the improved plant growth promotion performance of dual consortium. This  
44 knowledge provides new insights into efficient probiotics consortia design in *Bacillus*.

45

46 **KEYWORDS:** Social interactions, Mutual compatibility, *Bacillus velezensis*, Synthetic  
47 microbial consortia, Biofilm formation, Plant growth-promoting

48

## 49 **INTRODUCTION**

50 Microorganisms do not exist alone in the rhizosphere and live surrounded by an  
51 enormous number of other organisms in close communities (1). Microbes are social  
52 creatures that interact with and coordinate the behaviors of each other, exhibiting various  
53 forms of relationships, including commensalism, neutralism, cooperation, competition,  
54 etc. (2). Social interactions among microbes can affect microbial community  
55 development and composition (3). Notably, bacterial interactions in the fly gut affect host  
56 fitness related to development, fecundity, and lifespan (4). Specifically, fly lifespan and  
57 gut microbiome abundances are markedly influenced by interactions between bacterial  
58 species (4). However, due to complexity of plant-associated microbiomes, the  
59 information on social interactions among bacteria in the rhizosphere and how they are  
60 linked to plant fitness has not been established yet.

61 For combination of probiotic bacterium, mutual compatibility is an essential trait required  
62 for their synergistic effects on host fitness, and cooperative behavior between individuals

63 potentially enhanced their compatibility (5). Swarming is a bacterial cooperative behavior  
64 where billions of flagellated bacteria migrate together over solid surfaces (6). Studies  
65 have shown that cells of the soil bacteria *Bacillus subtilis* and *Myxococcus xanthus* can  
66 discriminate kin from nonkin in the context of swarming, where non-kin strains exhibit  
67 spatial segregation between swarms and kin merge (7, 8). Thus, it has been hypothesized  
68 that cooperative acts with a multitude of benefits are preferentially directed to highly  
69 related strains or kin (9). For *Bacillus*, three kinds of interaction phenotypes (merging,  
70 intermediate and boundary) could be observed on agar plates. Stefanic et al. (7) showed  
71 that cooperative behavior (merging of strains on swarming agar) is common among  
72 highly related strains of *B. subtilis* that share more than 99.5% identity at the *gyrA* genes  
73 and even between more distant *Bacillus* species (10). In contrast, antagonism/boundary  
74 prevails between *Bacillus* strains within species with less than 99.5% *gyrA* identity and  
75 between closely related species (10). This relatedness–sociality pattern has been also  
76 confirmed at the genome level of *B. subtilis* isolates (7). Additionally, it has been shown  
77 that *Bacillus* strains that merge their swarms also co-inhabit the plant root (7). Kin  
78 recognition or discrimination systems can elevate the kinship of relatives and thus  
79 stabilize cooperative behaviors (9).

80 Recent reports on kin discrimination (KD) system in *B. subtilis* suggested that this  
81 discrimination is achieved by nonkin exclusion rather than kin recognition (10, 11). *B.*  
82 *subtilis* cells produce a diverse array of toxins, and antibiotics form a blockade that only  
83 kin strains can survive. Moreover, several kin discrimination loci, including contact-  
84 dependent inhibition (CDI) protein (*wapAI*), cell-surface molecules (*lytC*, *dltA*, *tuaD*),  
85 and mobile elements such as phages, were identified by mutation (12). However, it is still

86 unclear how these numerous factors work synergistically and contribute to kin  
87 discrimination. The blockade formed by close relatives prevents public goods from being  
88 exploited by nonkin cells (11, 13). In bacterial cooperation, public goods are generally  
89 defined as compounds that provide a collective benefit, usually through release to the  
90 extracellular environment (14). The production of public goods by *Bacillus*, such as  
91 extracellular matrix (EPS), siderophores and lipopeptide (e.g. surfactin), are controlled by  
92 a quorum sensing system (15, 16) and by global transcriptional regulators such as Spo0A  
93 and DegU (14, 17). Social interactions among *Bacillus* strains influence the production of  
94 public goods at the community level; however, to the best of our knowledge, few studies  
95 have focused on how antagonisms or cooperativity affect secretions of lipopeptide  
96 antibiotics and plant growth promoting hormones by bacteria in multicellular groups.

97 Among *Bacillus* spp., *B. velezensis* SQR9 and FZB42 are the most extensively studied  
98 strains for revealing beneficial plant-microbe interactions, including the stimulation of  
99 root growth, facilitation of nutrient uptake, and prevention of diseases in plants (18–20).  
100 In addition, both of these strains are used commercially as biofertilizers for agricultural  
101 production. In this work, we observed that the swarming phenotype between the well-  
102 established plant growth-promoting bacteria (PGPB) *B. velezensis* SQR9 and FZB42  
103 switched from boundary to merging on agar plates after *spo0A* gene disruption. We  
104 further compared the properties that are beneficial to plants between mutual  
105 incompatibility consortia (SQR9 and FZB42) and mutual compatibility consortia  
106 (SQR9 $\Delta$ *spo0A* and FZB42). Our results demonstrated that microbial interactions affect  
107 community-level functions and behaviors in the rhizosphere.

## 108 RESULTS

109 ***B. velezensis* SQR9 antagonism against FZB42 at the swarm encounter depends on**

110 **Spo0A**

111 Swarming motility is a cooperative movement involving the exchange of public goods  
112 (14, 15), which can serve as a model system to address social interactions between strains  
113 at the point of swarm encounter. The results showed that *B. velezensis* SQR9 swarm  
114 forms a prominent boundary line with *B. velezensis* FZB42 in the swarming assay (Fig. 1),  
115 which according to published work suggests that interactions between strains involves  
116 antagonism and that this two strains are non-kin (12, 21). We previously reported that a  
117 novel Sfp-dependent fatty acid, bacillunoic acid, produced by SQR9, directly inhibits the  
118 growth of FZB42 on agar plates (22). We therefore tested whether bacillunoic acid might  
119 be involved in the SQR9-FZB42 boundary formation. However, the  $\Delta$ GI mutant of  
120 SQR9, which lacks the ability to biosynthesize bacillunoic acid, still exhibited a boundary  
121 phenotype similar to that of the wild-type strain (Fig. 1), which suggests that additional  
122 antagonistic factors contribute to SQR9-FZB42 boundary formation. Indeed, the  
123 SQR9 $\Delta$ sfp mutant showed slightly diminished boundary at the encounter with FZB42  
124 compared to the wild-type strain (Fig. 1). Sfp is a 4'-phosphopantetheinyl transferase that  
125 has been proven to be essential for the production of most lipopeptides and polyketides in  
126 FZB42 (23). Therefore, results in figure. 1 suggest that Sfp-dependent secondary  
127 metabolites of SQR9 might contribute to the swarm boundary phenotype.

128 In *Bacillus* spp., the global regulators Spo0A and DegU jointly control the transcription  
129 of multicellular behavior such as biofilm formation (24), swarming and production of  
130 lipopeptide antibiotics (17, 24). Interestingly, deletion of *spo0A*, but not *degU*, shifted the  
131 swarming phenotype from boundary to merging in the swarming assay with *B. velezensis*

132 FZB42 (Fig. 1). In contrast, deletion of *degU* preserved boundary. Moreover, the  
133 prominent boundary formed at increased distance from the point of SQR9 mutant  
134 inoculation to that of FZB42 (Fig. 1). Moreover, complementation of the *spo0A* gene in  
135 the SQR9 $\Delta$ *spo0A* mutant restored its ability to exhibit a boundary swarming phenotype  
136 with strain FZB42. Overall, we discovered that the regulator Spo0A in SQR9 is essential  
137 for boundary formation and potentially to its antagonism against FZB42.

### 138 **Antagonism between *B. velezensis* SQR9 and FZB42 affects biofilm formation and** 139 **root colonization phenotypes in cocultures**

140 A previous study demonstrated that kin strains formed mixed biofilms on roots, while  
141 nonkin strains engaged in antagonistic interactions, resulting in only one strain primarily  
142 colonizing the root (7). Although FZB42, SQR9 and SQR9 $\Delta$ *spo0A* mutant showed  
143 indistinguishable growth curves in monocultures (Fig. S1), we observed that  
144 coinoculation of SQR9 and FZB42 in MSgg liquid medium resulted in significant defects  
145 in biofilm formation (Fig. 2A, 2B & 2C) and strong antagonisms of SQR9 against FZB42,  
146 with only SQR9 remaining in coculture after 48 hours incubation (Fig. 2C). In contrast,  
147 the SQR9 $\Delta$ *spo0A* mutant, which formed thin and flat biofilms in monoculture regained  
148 in coculture with FZB42 a biofilm architecture indistinct from that of the monocultures  
149 (Fig. 2A). Moreover, the SQR9 $\Delta$ *spo0A* mutant and FZB42 coexisted in roughly equal  
150 proportion in coculture pellicle biofilms (Fig. 2B & 2C). This again suggests that deletion  
151 of *spo0A* alleviates the antagonisms of SQR9 against FZB42.

152 The root colonization pattern of these treatments correlated well with the measured  
153 values of pellicle biomass (Fig. 2D & 2E). After 2 days of incubation in the hydroponic

154 system, the results showed that approximately  $10^5$  CFU  $g^{-1}$  root of SQR9 or FZB42 cells  
155 were detected when inoculated as monocultures. However, only  $10^2$  CFU  $g^{-1}$  root of  
156 SQR9 $\Delta spo0A$  was detected in monoculture and  $10^2$  CFU  $g^{-1}$  root of the co-culture SQR9  
157 with FZB42, with SQR9 again showing a fitness advantage over FZB42 (Fig. 2D). When  
158 SQR9 $\Delta spo0A$  and FZB42 were co-inoculated in the hydroponic system, cumulatively  $10^3$   
159 CFU  $g^{-1}$  root was observed during the same period on the root, with slight competitive  
160 advantage of FZB42 over SQR9 $\Delta spo0A$  (Fig. 2D). After 4 days of incubation, root  
161 colonization by SQR9 and FZB42 reached a value of  $10^6$  CFU  $g^{-1}$  root, while only  $10^3$   
162 CFU  $g^{-1}$  root of SQR9 $\Delta spo0A$  or wild type coculture (SQR9+FZB42 treatment)  
163 colonized the root with even more evident dominance of wild type SQR9 over FZB42  
164 (Fig. 2E). However, the SQR9 dominance was lost when the SQR9 $\Delta spo0A$  mutant was  
165 used in coculture with FZB42, and lack of antagonism is also observed by high CFU  
166 counts of the coculture ( $10^6$  CFU  $g^{-1}$  root) (Fig. 2E). In summary, our results demonstrate  
167 that the swarming interaction phenotypes correlate with biofilm phenotype in liquid  
168 medium and on plant roots and are reflected in the community composition of a two-  
169 member *Bacillus* consortium.

#### 170 **Avoidance of antagonism promotes synergism in production of secondary** 171 **metabolites beneficial to plants**

172 In *B. subtilis*, the kin discrimination system also influences antibiotic gene expression (12)  
173 and above results suggest that Spo0A regulated antibiotic synthesis, which may  
174 contribute to antagonistic social behaviour. We therefore tested whether Spo0A linked  
175 SQR9-FZB42 swarm phenotype involves lipopeptide production (bacillomycin D and  
176 fengycin), which is also a major weapon for the growth inhibition of pathogenic fungi in



177 the rhizosphere (25, 26). To investigate this possibility, we first tested the antifungal  
178 activities of supernatants of monocultures and cocultures *in vitro* using the oxford cup-  
179 based agar diffusion assay. Both monocultures (SQR9 or FZB42) were more effective at  
180 antagonizing *Fusarium oxysporum* (FOC) than the coculture of SQR9 and FZB42. In line  
181 with the previous results on biofilm, the supernatant of SQR9 $\Delta$ *spo0A* mutant alone  
182 showed the lowest antifungal activity, in contrast the coculture of SQR9 $\Delta$ *spo0A* mutant  
183 and FZB42 showed the strongest antifungal activities visible as the clearing zone around  
184 the oxford cup (Fig. 3 & S2).

185 Previously, it was demonstrated that secretion of lipopeptides (bacillomycin D and  
186 fengycin) is the main mechanism by which SQR9 and FZB42 suppress the growth of *F.*  
187 *oxysporum* (27, 28). Additionally, methods for the detection of bacillomycin D and  
188 fengycin by RP-HPLC are well established (27). To further analyse the potential to exert  
189 antifungal activities *in vitro*, we monitored the production of bacillomycin D and  
190 fengycin in mono- and cocultures by HPLC. The results showed that the supernatants of  
191 the SQR9 $\Delta$ *spo0A* and FZB42 coculture showed the largest peak area of both  
192 bacillomycin D and fengycin, which can partly explain the strongest antifungal activities  
193 of this coculture *in vitro* (Fig. 4). Consistent with the above results the supernatant of the  
194 SQR9 and FZB42 coculture showed the smallest peak area of both bacillomycin D and  
195 fengycin (Fig. 4B).

196 The production of the phytohormones indole-3-acetic acid (IAA) and acetoin by *Bacillus*  
197 proved to be efficient in promoting plant growth (19), thus we tested whether the  
198 sociality of SQR9 $\Delta$ *spo0A*-FZB42 coculture also modulates plant hormone production.  
199 The coculture of SQR9 $\Delta$ *spo0A* and FZB42 showed the highest secretion of IAA and

200 acetoin, while the coculture of SQR9 and FZB42 showed the lowest secretion at both  
201 metabolites at 24- and 48-hour time points (Fig. 5). In summary, the Spo0A mutant of  
202 SQR9, when in co-culture with the FZB42 positively affects the production of plant  
203 beneficial secondary metabolites by *Bacillus velezensis* strains, with similar patterns  
204 observed for IAA and acetoin production.

205 **Alleviation of antagonistic interactions of two-member *Bacillus* consortia influences**  
206 **its plant promoting properties**

207 Root colonization and the production of secondary metabolites that are beneficial to  
208 plants are the two most important traits for efficient PGPB application (29, 30). We  
209 predicted that *Bacillus* consortia with mutual compatibility will perform better as  
210 biocontrol agents against pathogens than incompatible *Bacillus* consortia. The addition of  
211 monocultures and cocultures of SQR9 and FZB42 improved the plant height and shoot  
212 dry weight to varying degrees compared with cucumber plants inoculated with FOC (Fig.  
213 6). The plant shoot height and shoot dry weight analysis showed that the coculture of  
214 SQR9 $\Delta$ *spo0A* and FZB42 performed the best (Fig. 6B & 6C), the monoculture of SQR9  
215 was second best (Fig. 6B & 6C), and other treatments (FZB42, SQR9 $\Delta$ *spo0A*,  
216 SQR9+FZB42) ranked third in terms of plant growth promoting effects (Fig. 6B & 6C).  
217 Overall, plants inoculated by SQR9 $\Delta$ *spo0A* mutant and FZB42 mixed consortia showed  
218 the best growth under the FOC pathogen stress as both the plant height and shoot dry  
219 weight were almost identical to those of cucumber plants without the addition of FOC to  
220 the soil (Fig. 6).

221 To further investigate the mechanism underlying the plant promotion effect, we  
222 monitored the number of bacterial cells in the rhizosphere soil before harvest (50 days old  
223 plants). The results showed that both strains SQR9 and FZB42 could be detected in the  
224 coculture (SQR9+FZB42) treatment; however, the total number of cells was significantly  
225 lower than that of SQR9 or FZB42 monocultures (Fig. 6D). Cell number detected in  
226 coculture (SQR9 $\Delta$ spo0A+FZB42) treatment compared to monoculture of SQR9 or  
227 FZB42, and roughly equal amounts of strain SQR9 $\Delta$ spo0A and FZB42 coexisted in the  
228 rhizosphere community (Fig. 6D) while in SQR9+FZB42+FOC treatment, the strain  
229 SQR9 dominated the community colonizing the root (Fig. 6D). Overall, greenhouse  
230 experiments confirmed that the social interactions (swarming incompatibilities) indeed  
231 affected the activities of two-member *Bacillus* consortia that are beneficial to plants.

## 232 **DISCUSSION**

233 The application of synthetic microbial communities is a novel trend for developing robust  
234 and stable microbial fertilizers (31). However, less is known about how to manipulate  
235 and improve the function of the designed microbial communities. Mutual compatibility  
236 could be one of fundamental principles for rationally designed microbial consortia.  
237 Bacterial social interactions, such as antagonism and cooperation, are ubiquitous in  
238 microbial communities, and cooperation is known to facilitate the maintenance (32). Here,  
239 we demonstrated that antagonism between strains in the swarming assay influences  
240 cooperative and function of two-member consortia in the cucumber rhizosphere. The  
241 combined application of *Bacillus* strains whose swarms form a clearly visible boundary  
242 on swarming agar decreased the total abundance of *Bacillus* in the rhizosphere and  
243 reduced the production of bioactive secondary metabolites, resulting in decreased

244 benefits for plants. Astonishingly, diminished boundary line between *Bacillus* swarms  
245 correlated with the beneficial effects of SQR9 $\Delta$ *spo0A*-FZB42 consortia on FOC infected  
246 plants and the consortia dependent FOC was as efficient as SQR9 monoculture treatment.  
247 Moreover, SQR9 $\Delta$ *spo0A* or FZB42 monocultures did not show comparable protection  
248 against FOC. Understanding the role of social interactions in community-level function is  
249 thus important for synthetic microbial community design.

250 For cooperation behaviours, bacteria usually exhibit KD-like behavior, in particular while  
251 engaged in swarming (10). The KD system in environmental bacteria is usually  
252 correlated with the production of bacteriocins (33), and the cost trade-off between  
253 bacteriocins and the secretion of secondary metabolites that are beneficial to plants could  
254 cause the poor effects of this approach on benefits for plants. Indeed, our results showed  
255 that the production of plant beneficial secondary metabolites (bacillomycin D, fengycin,  
256 IAA and acetoin) are highly correlated with the swarm discrimination phenotype in a  
257 two-member consortia of *Bacillus velezensis*. This idea is also supported by the  
258 observation that co-inoculation of antagonistic non-kin *B. subtilis* strains leads to strain  
259 exclusion on plant roots (7). Our results are consistent with this observation and show  
260 partial exclusion of FZB42 by SQR9 and coexistence of SQR9 $\Delta$ *spo0A* mutant with  
261 SQR9. We therefore suggest that combined application of antagonistic PGPR strains  
262 could have negative effects on its plant beneficial function realization and survival.

263 An important feature of the kinship dependent cooperation is sharing of ‘public goods’  
264 that benefit all cells irrespective of which cells produce them (10). A loss of antagonisms  
265 and the concomitant increase in the production of secondary metabolites that are  
266 beneficial to plants (IAA, acetoin, lipopeptides) in coculture (SQR9 $\Delta$ *spo0A*+FZB42)

267 may in part explain the beneficial effect on plants. It has been reported that the  
268 amphipathic lipopeptide surfactin acts a ‘public good’ produced by *B. subtilis* and that it  
269 is necessary for multicellular swarming by reducing the water surface tension (16). In this  
270 study, this function may be supplemented by the lipopeptides bacillomycin D and  
271 fengycin, which can also act as biosurfactants and could be therefore potential ‘public  
272 goods’ in coculture environments (34). Most importantly, previous studies demonstrated  
273 that bacillomycin D and fengycin are the major compounds that inhibit the growth of  
274 FOC by both SQR9 and FZB42 (27, 28). For plant growth-promoting (PGP) compounds,  
275 due to the limited knowledge of how biosynthesis of IAA and acetoin are regulated in  
276 *Bacillus*, it is difficult to disentangle the correlation between the KD like behavior and  
277 PGP compound production, but our results are in line with the prediction that *spo0A*  
278 potentially controls synthesis of both plant hormones.

279 Here, we observed that SQR9 wild type formed boundary but SQR9 $\Delta$ *spo0A* mutant  
280 merged with the wild-type FZB42 (Fig. 1). According to recent reports boundary  
281 formation is tightly associated with antagonism (14, 21) at the swarm encounter. Our  
282 results also suggest that SQR9 and FZB42 engage in antagonisms and that lack of Spo0A  
283 in SQR9 reduces the efficiency of the antimicrobial attack and defense systems. Although  
284 further investigations are required to identify the underlying molecular mechanism by  
285 which *spo0A* is involved in the KD like response during swarming, it is known that  
286 Spo0A is the master regulator that is dependent on the phosphorylation state (35) and that  
287 phosphorylated Spo0A is needed to induce sporulation, synthesis of several antibiotics  
288 and production of extracellular matrix (36). In *B. subtilis*, the lack of extracellular matrix  
289 impacted kin dependent recognition with the parental strain (14), but the absence of the

290 matrix polysaccharide in the mutant strain resulted in a boundary phenotype when  
291 competed against the parental strain. This differs from our results where the *spo0A*  
292 mutant, known to produce less matrix components (24) still merged with the parental  
293 strain and even with the non-kin. It seems that disappearance of a boundary between  
294 SQR9 $\Delta$ *spo0A* mutant and FZB42 removed the SQR9 dependent antagonism during the  
295 swarm encounter and simultaneously promoted the production of plant beneficial  
296 antifungals and hormones.

297 Besides Spo0A the DegS/U two-component system acts as a global regulatory system in  
298 *Bacillus subtilis*, where phosphorylated DegU is involved in regulation of genetic  
299 competence, swarming motility, biofilm formation and exoprotease secretion, and a small  
300 protein DegQ modulates DegU phosphorylation (37, 38). However, in *Bacillus velezensis*  
301 SQR9, according to our results *degU* mutant still displayed swarming motility and  
302 formed stronger boundaries with FZB42 on swarming agar. One possibility is that  
303 deletion of the *degU* gene improved the production of an antibiotic exerting its activity at  
304 the swarm encounter. Previous studies discovered that disruption of *degQ* gene in  
305 *Bacillus subtilis* NCD-2 increased the production of fengycin and surfactin (39) but  
306 whether these two antibiotics and DegU/S system contribute to boundary formation  
307 between non-kin strains remains to be studied in the future.

308 In conclusion, our findings suggest that the swarm discrimination phenotype between  
309 PGPR strains may reflect the community level effects when used as consortia for plant  
310 protection. Although our observation is only based on interactions between two plant  
311 beneficial strains, SQR9 and FZB42, they suggest that strains that antagonize at the  
312 swarm encounter also engage in competition on plant roots which may diminish their

313 beneficial effect on plants. To prove this hypothesis more strains need to be tested, but  
314 our results imply that swarm interaction may serve as a predictive read out for synergistic  
315 effects between inoculants, which may have important implications for the design and  
316 application of synthetic *Bacillus* communities in concrete applications.

317

## 318 **MATERIALS AND METHODS**

### 319 **Strains and growth conditions**

320 The strains used in this study are listed in Table 1. *B. velezensis* strain SQR9 (CGMCC  
321 accession no. 5808; China General Microbiology Culture Collection Center) was used  
322 throughout this study. *B. velezensis* FZB42 and green fluorescent protein (GFP)-labeled *B.*  
323 *velezensis* FZB42 were acquired as kind gifts from Ben Fan (Nanjing Forestry University)  
324 and through the *Bacillus* Genetic Stock Center. *B. velezensis* strains and their mutants  
325 were grown in Luria-Bertani (LB) medium. Biofilm assays were performed in 24-well  
326 plates with 2 mL of MSgg medium (5 mM potassium phosphate, 100 mM  
327 morpholinepropanesulfonic acid (MOPS) pH 7, 2 mM MgCl<sub>2</sub>, 700 μM CaCl<sub>2</sub>, 50 μM  
328 MnCl<sub>2</sub>, 50 μM FeCl<sub>3</sub>, 1 μM ZnCl<sub>2</sub>, 2 mM thiamine, 0.5% glycerol, 0.5% glutamate, 50  
329 μg mL<sup>-1</sup> tryptophan, 50 μg mL<sup>-1</sup> phenylalanine, and 50 μg mL<sup>-1</sup> threonine) (40). For  
330 lipopeptide production and HPLC characterization, *B. velezensis* strains were grown in  
331 Landy medium (20 g L<sup>-1</sup> glucose, 5 g L<sup>-1</sup> L-glutamic acid, 1 g L<sup>-1</sup> KH<sub>2</sub>PO<sub>4</sub>, 1 g L<sup>-1</sup> yeast  
332 extract, 0.5 g L<sup>-1</sup> MgSO<sub>4</sub> 7H<sub>2</sub>O, 0.5 g L<sup>-1</sup> KCl, 5 mg L<sup>-1</sup> MnSO<sub>4</sub> H<sub>2</sub>O, 0.16 mg L<sup>-1</sup> CuSO<sub>4</sub>  
333 7H<sub>2</sub>O, 0.15 mg L<sup>-1</sup> FeSO<sub>4</sub> 7H<sub>2</sub>O, 2 mg L<sup>-1</sup> L-phenylalanine, 1 g L<sup>-1</sup> L-tryptophan, pH 7.0)  
334 (41). Antibiotics were added as required at the following concentrations: 20 μg mL<sup>-1</sup>

335 zeocin, 5  $\mu\text{g mL}^{-1}$  chloramphenicol (Cm), 5  $\mu\text{g mL}^{-1}$  erythromycin (Em) and 100  $\mu\text{g mL}^{-1}$   
336 ampicillin.

### 337 **Swarming boundary assay**

338 To test the social interaction between approaching swarms of wild-type *B. velezensis*  
339 FZB42, SQR9 and its mutants, 9-cm plates containing B-medium with 0.7% agar were  
340 freshly prepared (7). Strains were grown on solid Luria-Bertani (LB) plates at 30 °C for  
341 16 h before use and then transferred to 3 mL of liquid B-medium and shaken overnight at  
342 30 °C. The overnight cultures were then diluted to an optical density (OD<sub>600</sub>) of 0.5, and  
343 2  $\mu\text{L}$  was spotted on the plates at each side of the agar plate. The plates were dried in  
344 a laminar flow hood for 20 min, incubated for 2 days at 30 °C, and photographed. Three  
345 phenotypes (merge, intermediate and boundary) were assigned from the photos (7).

### 346 **Growth curve measurement**

347 Growth curve experiments were assessed in 200  $\mu\text{L}$  minimal medium-glucose-yeast  
348 (MSgg) medium in 96-well microtiter plates. The initial inoculum size was set at an  
349 OD<sub>600</sub> value of 0.05. The OD<sub>600</sub> was measured every 30 min at 30 °C with a Bioscreen C  
350 Automated Microbiology Growth Curve Analysis System (Growth Curve, USA). This  
351 assay was repeated three times.

### 352 **Construction of the marker-free deletion of *spo0A* gene in SQR9**

353 The deletion of the *spo0A* gene was constructed using the *Pbc-pheS<sup>#</sup>-cat* (PC) cassette  
354 and overlap-PCR-based strategy as previously described (42). The construction of the PC  
355 cassette was carried out as described by Zhou et al. (43). Briefly, fragments including



356 homologous sequences and PC cassettes were constructed by using overlap-PCR and  
357 then directly transformed into strain SQR9. The transformants were selected on LB plates  
358 containing Cm (5 µg/mL). The chloramphenicol-resistant colonies were cultivated to an  
359 OD<sub>600</sub> of 1.0 without Cm, and a 100 mL aliquot of a 10-fold dilution of cultures  
360 (approximately 10<sup>5</sup> cells) was plated on MGY-CI medium (42). Targeted mutants were  
361 further confirmed by DNA sequencing.

### 362 **Biofilm assays**

363 The pellicle biofilm assay was carried out in 24-well microtiter plates insert with 100 µm  
364 Sterile Nylon Mesh Cell Strainers (Biologix Cat#15-1100) in MSgg liquid medium, as  
365 described by Hamon and Lazazzera (44). After incubation, the cell strainer was taken out,  
366 pellicle biofilm formation was quantified by staining with crystal violet (CV). Cells in the  
367 pellicle biofilm were stained with CV, and then, unbound CV was removed with distilled  
368 water. The remaining CV was solubilized with 80% ethanol-20% acetone (1 mL). The  
369 absorbance of CV was measured using the SpectraMax i3x analysis system (Molecular  
370 Devices Corporation, CA) at 570 nm. For quantification of SQR9 and FZB42 cells in the  
371 pellicle biofilm, we conducted this experiment by labeled strains: using SQR9-pUBXC  
372 (carrying zeocin resistance gene) and GFP-labeled FZB42 (carrying erythromycin  
373 resistance gene). All cells in the pellicle which attached to the cell strainer were analyzed  
374 using the plate counting method with corresponding antibiotics.

### 375 **Bioassay of antagonistic activities against *F. oxysporum* of supernatants of** 376 **monocultures and cocultures**

377 *B. velezensis* cells were grown in Landy medium at 30 °C for 48 h, and LPs were then  
378 isolated by acid precipitation with concentrated HCl at pH 2.0. The precipitate was  
379 recovered by centrifugation at 8,000 ×g for 20 min, washed twice with acidic deionized  
380 water (pH 2.0), and then extracted twice with methanol (27). The pooled extraction  
381 solution was filtered through a 0.22 µm pore hydrophilic membrane, and a volume of 50  
382 µL of extraction solution was dropped into an Oxford cup placed 2 cm from the edge of a  
383 petri plate and allowed to diffuse into agar. A plug (about 1 cm in diameter) of *F.*  
384 *oxysporum* from a 5-day-old (25°C) PDA plate of the growing *F. oxysporum* was placed  
385 in the center. The plates were then incubated at 25°C, and the distance between the edges  
386 of the petri dish and the fungal mycelium were measured after 5 days. The same volume  
387 of methanol was used as control. The experiment was repeated three times.

#### 388 **Detection of lipopeptides (LPs) by reverse-phase (RP) HPLC**

389 To compare the production of LPs produced by monocultures and cocultures of *Bacillus*  
390 strains, the supernatant was analysed by reversed-phase high-performance liquid  
391 chromatography (RP-HPLC) in a previous study (20, 27). Briefly, cells were grown in  
392 Landy medium at 30 °C for 48 h, and LPs were isolated as described above. The pooled  
393 extraction solution was filtered through a 0.22 µm pore hydrophilic membrane and then  
394 dried with a rotary vacuum evaporator. Finally, the residue was dissolved in 1 mL of  
395 phosphorous buffer (PBS; 0.01 M [pH 7.4]).

396 The determination conditions of bacillomycin D and fengycin were established by  
397 injecting 10 µL samples into an HPLC column (Eclipse XDB-C18, 5 µm; Agilent, Santa  
398 Clara, CA). The temperature was maintained at 30 °C during the experiment. The run

399 was performed with a flow rate of 0.75 mL/min and a gradient of solvent A (0.1%  
400 [vol/vol] HCOOH) and B (CH<sub>3</sub>CN) and then 100% B after 20 min. To equilibrate the  
401 column, it was treated with 5% CH<sub>3</sub>CN-HCOOH for 3 min. A UV detector was used to  
402 detect the target peaks at 230 nm (27).

### 403 **IAA production**

404 We grew individual *Bacillus* cells and their consortia in liquid Landy medium for 72 h at  
405 22 °C in the dark with constant shaking (90 rpm). Bacterial cultures were then  
406 centrifuged (at 10000 g for 5 min), and the IAA concentration of the supernatants (ng/mL)  
407 was measured with an IAA ELISA Kit (R&D, Shanghai, China) following the  
408 manufacturer's protocol (19). This assay was repeated three times.

### 409 **Acetoin production**

410 Detection of acetoin in the monocultures and cocultures of *Bacillus* strains were  
411 performed by the method of Nicholson (45) as follows: one hundred forty microliters of  
412 creatine (0.5% [w/v] in water), 200 µL of  $\alpha$ -naphthol (5% [w/v] in 95% ethanol), and 200  
413 µL of KOH (40% [w/v] in water) were sequentially added to 200 µL of acetoin standard  
414 solution or appropriately diluted culture supernatant. The mixed samples were vortexed  
415 after each addition. The reaction mixtures were vortexed again after incubation for 15  
416 min at room temperature before the measurement of A<sub>560</sub>.

### 417 **Root colonization**

418 Each *Bacillus* strain and consortia of two strains were inoculated into the culture of two-  
419 week old sterile cucumber seedlings grown in 1/4 Murashige and Skoog (MS) culture

420 medium. After 2 and 4 days, the *Bacillus* cells that had colonized the cucumber roots  
421 were collected and quantified using the method described by Xu et al. (42). The number  
422 of attached cells (SQR9-pUBXC and GFP-labelled FZB42) were analysed using the plate  
423 counting method with media supplemented with corresponding antibiotics.

#### 424 **Greenhouse experiment**

425 The greenhouse experiment was conducted from 25 July to 20 September 2020 at  
426 Nanjing Agricultural University. The soils used for the pot experiments were collected  
427 from a field with a history of cucumber cultivation with the following properties: pH 5.9;  
428 organic matter, 25.3 g kg<sup>-1</sup>; available N, 166.5 mg kg<sup>-1</sup>; available P 127.8 mg kg<sup>-1</sup>;  
429 available K, 256.8 mg kg<sup>-1</sup>; total N, 1.9 g kg<sup>-1</sup>; total P, 1.7 g kg<sup>-1</sup>; and total K, 15.2 g kg<sup>-1</sup>.

430 The surfaces of cucumber seeds (Jinchun No. 4) were disinfected in 2% sodium  
431 hypochlorite for 4 min and then germinated in seedling trays at 28 °C. Two-week-old  
432 seedlings were transplanted into pots with 600 g of sterilized soil. Seven treatments were  
433 designed as follows: (1) CK (control, sterilized soil without inoculation); (2) FOC  
434 (sterilized soil inoculated with *F. oxysporum*); (3) SQR9+FOC (sterilized soil first  
435 inoculated with *F. oxysporum* then with *B. velezensis* SQR9); (4) FZB42+FOC (sterilized  
436 soil first inoculated with *F. oxysporum* then with *B. velezensis* FZB42); (5) Spo0A+FOC  
437 (sterilized soil first inoculated with *F. oxysporum* then with  $\Delta spo0A$  mutant of SQR9); (6)  
438 SQR9+FZB42+FOC (sterilized soil first inoculated with *F. oxysporum* then with *B.*  
439 *velezensis* SQR9 and FZB42, respectively); and (7) Spo0A+FZB42+FOC (sterilized soil  
440 first inoculated with *F. oxysporum* then with *B. velezensis*  $\Delta spo0A$  mutant of SQR9 and  
441 wild type FZB42, respectively). All strains were individually mixed into the soil as

442 follows. Two weeks before transplant, *F. oxysporum* was first inoculated into the soil at  
443  $10^5$  spores  $g^{-1}$  soil. One week after transplantation, *B. velezensis* cells (SQR9, FZB42 and  
444  $\Delta spo0A$ ) were inoculated into soil at  $10^7$  cfu  $g^{-1}$ . For the SQR9+FZB42 and  
445 Spo0A+FZB42 treatments, the SQR9 or SQR9 $\Delta spo0A$  mutant was inoculated first, the  
446 strain FZB42 was inoculated 2 days later, and both of them reached a cell density of  $10^7$   
447 cfu  $g^{-1}$  of soil. Each treatment was replicated 6 times. The cucumber plant was incubated  
448 in a growth chamber at 30 °C under a 16 h light regimen and irrigated with 1/4 h  
449 Hoagland medium.

#### 450 **Statistical analysis**

451 Differences among the treatments were calculated and statistically analysed with a one-  
452 way analysis of variance (ANOVA). Duncan's multiple-range test was used when the  
453 one-way ANOVA indicated a significant difference ( $p < 0.05$ ). All statistical analyses  
454 were performed with IBM SPSS Statistics 20.

#### 455 **ACKNOWLEDGEMENTS**

456 This work was financially supported by the National Nature Science Foundation of China  
457 (31972512, 32072675 and 32072665), the Fundamental Research Funds for the Central  
458 Universities (KYXK202009). IMM and PS were supported by the Slovenian Research  
459 program P4-0116 and the projects J4-9302 and J4-8228.

#### 460 **Data Accessibility**

461 The accession numbers of the genome sequence of *Bacillus amyloliquefaciens* SQR9 and  
462 FZB42 in the NCBI are: CP006890.1 and CP000560.2.

463 **Author contributions**

464 JS, YL, ZX designed the study, and JS, YL, JX, YL performed the experiments. JS, YL,  
465 ZX, JX analyzed the data and created the figures. JS and YL wrote the first draft of the  
466 manuscript, and ZX, IMM, PS, BF, RZ and QS revised the manuscript.

467 **Declaration of interests**

468 The authors declare that they have no conflicts of interest.

469

470 **REFERENCES**

- 471 1. Wall D. 2016. Kin recognition in bacteria. *Annu Rev Microbiol* 70:143–160.  
472 10.1146/annurev-micro-102215-095325.
- 473 2. West SA, Diggle SP, Buckling A, Gardner A, Griffin AS. 2007. The social lives of  
474 microbes. *Annu Rev Ecol Evol Syst* 38:53–77.  
475 10.1146/annurev.ecolsys.38.091206.095740.
- 476 3. Kong W, Meldgin DR, Collins JJ, Lu T. 2018. Designing microbial consortia with  
477 defined social interactions. *Nat Chem Biol* 14:821–829. 10.1038/s41589-018-  
478 0091-7.
- 479 4. Gould AL, Zhang V, Lamberti L, Jones EW, Obadia B, Korasidis N, Gavryushkin A,  
480 Carlson JM, Beerenwinkel N, Ludington WB. 2018. Microbiome interactions  
481 shape host fitness. *Proc Natl Acad Sci U S A* 115:E11951–E11960.  
482 10.1073/pnas.1809349115.
- 483 5. Palmieri D, Vitullo D, De Curtis F, Lima G. 2017. A microbial consortium in the  
484 rhizosphere as a new biocontrol approach against *Fusarium decline* of chickpea.  
485 *Plant Soil* 412:425–439. 10.1007/s11104-016-3080-1.
- 486 6. Yan J, Monaco TH, Xavier JB. 2019. The ultimate guide to bacterial swarming: An  
487 experimental model to study the evolution of cooperative behavior. *Annu Rev*  
488 *Microbiol* 73:293–312. 10.1146/annurev-micro-020518-120033.
- 489 7. Stefanic P, Kraigher B, Lyons NA, Kolter R, Mandic-Mulec I. 2015. Kin  
490 discrimination between sympatric *Bacillus subtilis* isolates. *Proc Natl Acad Sci U*  
491 *S A* 112:14042–14047. 10.1073/pnas.1512671112.

- 492 8. Wielgoss S, Fiegna F, Rendueles O, Yu YTN, Velicer GJ. 2018. Kin discrimination  
493 and outer membrane exchange in *Myxococcus xanthus*: A comparative analysis  
494 among natural isolates. *Mol Ecol* 27:3146–3158.  
495 10.1111/mec.14773.
- 496 9. Strassmann JE, Gilbert OM, Queller DC. 2011. Kin discrimination and cooperation in  
497 microbes. *Annu Rev Microbiol* 65:349–367.  
498 10.1146/annurev.micro.112408.134109.
- 499 10. Lyons NA, Kolter R. 2017. *Bacillus subtilis* protects public goods by extending kin  
500 discrimination to closely related species. *MBio* 8:e00723–17. 10.1128/mBio  
501 .00723-17.
- 502 11. Kraigher B, Butulken M, Stefanic P, Mandic-Mulec I. 2021. Kin discrimination  
503 drives territorial exclusion during *Bacillus subtilis* swarming and restrains  
504 exploitation of surfactin. *ISME J* (in press). 10.1038/s41396-021-01124-4.
- 505 12. Lyons NA, Kraigher B, Stefanic P, Mandic-Mulec I, Kolter R. 2016. A combinatorial  
506 kin discrimination system in *Bacillus subtilis*. *Curr Biol* 26:733–742.  
507 10.1016/j.cub.2016.01.032.
- 508 13. Mehdiabadi NJ, Jack CN, Farnham TT, Platt TG, Kalla SE, Shaulsky G, Queller DC,  
509 Strassmann JE. 2006. Kin preference in a social microbe. *Nature* 442:881–882.  
510 10.1038/442881a.
- 511 14. Kalamara M, Spacapan M, Mandic-Mulec I, Stanley-Wall NR. 2018. Social  
512 behaviours by *Bacillus subtilis*: quorum sensing, kin discrimination and beyond.  
513 *Mol Microbiol* 110:863–878. 10.1111/mmi.14127.
- 514 15. Kearns DB, Losick R. 2004. Swarming motility in undomesticated *Bacillus subtilis*.  
515 *Mol Microbiol* 49:581–590. 10.1046/j.1365-2958.2003.03584.x.
- 516 16. Spacapan M, Danevcic T, Stefanic P, Porter M, Stanley-Wall NR, Mandic-Mulec I.  
517 2020. The comX quorum sensing peptide of *Bacillus subtilis* affects biofilm  
518 formation negatively and sporulation positively. *Microorganisms* 8:1131.  
519 10.3390/microorganisms8081131.
- 520 17. Mader U, Antelmann H, Buder T, Dahl MK, Hecker M, Homuth G. 2002. *Bacillus*  
521 *subtilis* functional genomics: genome-wide analysis of the DegS-DegU regulon by  
522 transcriptomics and proteomics. *Mol Genet Genomics* 268:455–467.  
523 10.1007/s00438-002-0774-2.
- 524 18. Chowdhury SP, Hartmann A, Gao XW, Borriss R. 2015. Biocontrol mechanism by  
525 root-associated *Bacillus amyloliquefaciens* FZB42 - A review. *Front Microbiol*  
526 6:780. 10.3389/fmicb.2015.00780.
- 527 19. Shao J, Xu Z, Zhang N, Shen Q, Zhang R. 2014. Contribution of indole-3-acetic acid  
528 in the plant growth promotion by the rhizospheric strain *Bacillus*  
529 *amyloliquefaciens* SQR9. *Biol Fertil Soils* 51:321–330. 10.1007/s00374-014-0978-  
530 8.



- 531 20. Xu Z, Zhang R, Wang D, Qiu M, Feng H, Zhang N, Shen Q. 2014. Enhanced control  
532 of cucumber wilt disease by *Bacillus amyloliquefaciens* SQR9 by altering the  
533 regulation of its DegU phosphorylation. *Appl Environ Microbiol* 80:2941–2950.  
534 10.1128/AEM.03943-13.
- 535 21. Stefanic P, Belcijan K, Kraigher B, Kostanjsek R, Nesme J, Madsen JS, Kovac J,  
536 Sorensen SJ, Vos M, Mandic-Mulec I. 2021. Kin discrimination promotes  
537 horizontal gene transfer between unrelated strains in *Bacillus subtilis*. *Nat*  
538 *Commun* 12:3457. 10.1038/s41467-021-23685-w.
- 539 22. Wang D, Xu Z, Zhang G, Xia L, Dong X, Li Q, Liles MR, Shao J, Shen Q, Zhang R.  
540 2019. A genomic island in a plant beneficial rhizobacterium encodes novel  
541 antimicrobial fatty acids and a self-protection shield to enhance its competition.  
542 *Environ Microbiol* 21:3455–3471. 10.1111/1462-2920.14683.
- 543 23. Chen XH, Vater J, Piel J, Franke P, Scholz R, Schneider K, Koumoutsi A, Hitzeroth  
544 G, Grammel N, Strittmatter AW, Gottschalk G, Süßmuth RD, Borriss R. 2006.  
545 Structural and functional characterization of three polyketide synthase gene  
546 clusters in *Bacillus amyloliquefaciens* FZB42. *J Bacteriol* 188:4024–4036.  
547 10.1128/JB.00052-06.
- 548 24. Verhamme DT, Murray EJ, Stanley-Wall NR. 2009. DegU and Spo0A jointly control  
549 transcription of two loci required for complex colony development by *Bacillus*  
550 *subtilis*. *J Bacteriol* 911:100–108. 10.1128/JB.01236-08.
- 551 25. Xu Z, Xie J, Zhang H, Wang D, Shen Q, Zhang R. 2019. Enhanced control of plant  
552 wilt disease by a xylose-inducible *degQ* gene engineered into *Bacillus velezensis*  
553 strain SQR9XYQ. *Phytopathology* 109:36–43. 10.1094/PHYTO-02-18-0048-R.
- 554 26. Xu Z, Mandic-Mulec I, Zhang H, Liu Y, Sun X, Feng H, Xun W, Zhang N, Shen Q,  
555 Zhang R. 2019. Antibiotic bacillomycin D affects iron acquisition and biofilm  
556 formation in *Bacillus velezensis* through a Btr-mediated FeuABC-dependent  
557 pathway. *Cell Rep* 29:1192–1202. 10.1016/j.celrep.2019.09.061.
- 558 27. Xu Z, Shao J, Li B, Yan X, Shen Q, Zhang R. 2013. Contribution of bacillomycin D  
559 in *Bacillus amyloliquefaciens* SQR9 to antifungal activity and biofilm formation.  
560 *Appl Environ Microbiol* 79:808–815. 10.1128/AEM.02645-12.
- 561 28. Koumoutsi A, Chen XH, Vater J, Borriss R. 2007. DegU and YczE positively  
562 regulate the synthesis of bacillomycin D by *Bacillus amyloliquefaciens* strain  
563 FZB42. *Appl Environ Microbiol* 73:6953–6964. 10.1128/AEM.00565-07.
- 564 29. Lugtenberg B, Faina K. 2009. Plant-growth-promoting rhizobacteria. *Annu Rev*  
565 *Microbiol* 63:541–556. 10.1146/annurev.micro.62.081307.162918.
- 566 30. Santhanam R, Menezes RC, Grabe V, Li D, Baldwin IT, Groten K. 2019. A suite of  
567 complementary biocontrol traits allows a native consortium of root-associated  
568 bacteria to protect their host plant from a fungal sudden-wilt disease. *Mol Ecol*  
569 28:1154–1169. 10.1111/mec.15012.
- 570 31. Eng A, Borenstein E. 2019. Microbial community design: methods, applications, and  
571 opportunities. *Curr Opin Biotechnol* 58:117–128. 10.1016/j.copbio.2019.03.002.



- 572 32. Kong WT, Meldgin DR, Collins JJ, Lu T. 2018. Designing microbial consortia with  
573 defined social interactions. *Nat Chem Biol* 14:821–829. 10.1038/s41589-018-  
574 0091-7.
- 575 33. Riley MA, Wertz JE. 2002. Bacteriocins: evolution, ecology, and application. *Annu*  
576 *Rev Microbiol* 56:117–137. 10.1146/annurev.micro.56.012302.161024.
- 577 34. Kim PI, Ryu J, Kim YH, Chl YT. Production of biosurfactant lipopeptides iturin A,  
578 fengycin, and surfactin A from *Bacillus subtilis* CMB32 for control of  
579 *colletotrichum gloeosporioides*. *J Microbiol Biotechnol* 20:138–145.  
580 10.4014/jmb.0905.05007.
- 581 35. Fujita M, Losick R. 2005. Evidence that entry into sporulation in *Bacillus subtilis* is  
582 mediated by gradual activation of a master regulator spo0A. *Genes Dev* 19:2236–  
583 2244. 10.1101/gad.1335705.
- 584 36. Fujita M, González-Pastor JE, Losick R. 2005. High- and low-threshold genes in the  
585 Spo0A regulon of *Bacillus subtilis*. *J Bacteriol* 187:1357–1368.  
586 10.1128/JB.187.4.1357-1368.2005.
- 587 37. Verhamme DT, Kiley TB, Stanley-Wall NR. 2007. DegU co-ordinates multicellular  
588 behaviour exhibited by *Bacillus subtilis*. *Mol Microbiol* 65:554–568.  
589 10.1111/j.1365-2958.2007.05810.x.
- 590 38. Kobayashi K. 2007. Gradual activation of the response regulator DegU controls serial  
591 expression of genes for flagellum formation and biofilm formation in *Bacillus*  
592 *subtilis*. *Mol Microbiol* 66:395–409. 10.1111/j.1365-2958.2007.05923.x.
- 593 39. Wang P, Guo Q, Ma Y, Li S, Lu X, Zhang X, Ma P. 2015. DegQ regulates the  
594 production of fengycins and biofilm formation of the biocontrol agent *Bacillus*  
595 *subtilis* NCD-2. *Microbiol Res* 178:42–50. 10.1016/j.micres.2015.06.006.
- 596 40. Branda SS, González-Pastor JE, Ben-Yehuda S, Losick R, Kolter R. 2001. Fruiting  
597 body formation by *Bacillus subtilis*. *Proc Natl Acad Sci U S A* 98:11621–11626.  
598 10.1073/pnas.191384198.
- 599 41. Landy M, Warren GH, Rosenmann SB, Colio LG. 1948. Bacillomycin: An antibiotic  
600 from *Bacillus subtilis* active against pathogenic fungi. *Proc Soc Exp Biol Med*  
601 67:539–541. 10.3181/00379727-67-16367.
- 602 42. Xu Z, Zhang H, Sun X, Lui Y, Yan W, Xun W, Shen Q, Zhang R. 2019. *Bacillus*  
603 *velezensis* Wall teichoic acids are required for biofilm formation and root  
604 colonization. *Appl Environ Microbiol* 85:e02116-02118. 10.1128/AEM.02116-18.
- 605 43. Zhou C, Shi L, Ye B, Feng H, Zhang J, Zhang R, Yan X. 2017. *pheS*\*, an effective  
606 host-genotype-independent counter-selectable marker for marker-free chromosome  
607 deletion in *Bacillus amyloliquefaciens*. *Appl Microbiol Biotechnol* 101:217–227.  
608 10.1007/s00253-016-7906-9.
- 609 44. Hamon MA, Lazazzera BA. 2001. The sporulation transcription factor Spo0A is  
610 required for biofilm development in *Bacillus subtilis*. *Mol Microbiol* 42:1199–  
611 1209. 10.1046/j.1365-2958.2001.02709.x.

- 612 45. Nicholson WL. 2008. The *Bacillus subtilis ydjL (bdhA)* gene encodes acetoin  
 613 reductase/2,3- butanediol dehydrogenase. *Appl Environ Microbiol* 74:6832–6838.  
 614 10.1128/AEM.00881-08.
- 615 46. Li Q, Li Z, Li X, Xia L, Zhou X, Xu Z, Shao J, Shen Q, Zhang R. 2018. FtsEX-CwlO  
 616 regulates biofilm formation by a plant-beneficial rhizobacterium *Bacillus*  
 617 *velezensis* SQR9. *Res Microbiol* 169:166–176. 10.1016/j.resmic.2018.01.004.
- 618 47. Fan B, Chen XH, Budiharjo A, Bleiss W, Vater J, Borriss R. 2011. Efficient  
 619 colonization of plant roots by the plant growth promoting bacterium *Bacillus*  
 620 *amyloliquefaciens* FZB42, engineered to express green fluorescent protein. *J*  
 621 *Biotechnol* 151:303–311. 10.1016/j.jbiotec.2010.12.022.

622

623

624

625

626

627 Table 1. Microorganisms used in this study

| Strains                    | Characteristics                                                          | Reference or source   |
|----------------------------|--------------------------------------------------------------------------|-----------------------|
| Fungi                      |                                                                          |                       |
| <i>F. oxysporum</i> f. sp. |                                                                          |                       |
| <i>cucumerinum</i> J. H.   |                                                                          | Laboratory stock (27) |
| Owen (FOC NJAU-<br>2)      |                                                                          |                       |
| Bacteria                   |                                                                          |                       |
|                            | F-mcrAΔ (mrr-hsdRMS-mcrBC)                                               |                       |
| <i>E.coli</i> top 10       | ψ80lacZΔM15Δ lacX74 nupG recA1<br>araD139Δ (ara-leu) 7697 galE15 galK 16 | Invitrogen (Shanghai) |

---

|                                           |                                                                                                   |                  |
|-------------------------------------------|---------------------------------------------------------------------------------------------------|------------------|
|                                           | rpsL (StrR) end A1λ-                                                                              |                  |
| <i>B. velezensis</i> SQR9                 | Wild type                                                                                         | Laboratory stock |
| <i>B. velezensis</i> SQR9--<br>pUBXC      | <i>B. velezensis</i> SQR9 with pUBXC, Zeo <sup>R</sup>                                            | (46)             |
| <i>B. velezensis</i> FZB42                | Wild type                                                                                         | (47)             |
| <i>B. velezensis</i> FZB42-<br><i>gfp</i> | GFP labeled <i>B. velezensis</i> FZB42, Em <sup>R</sup>                                           | (47)             |
| ΔGI                                       | Mutant of <i>B. velezensis</i> SQR9, ΔGI, (Cm <sup>R</sup><br>Zeo <sup>R</sup> )                  | (22)             |
| Δ <i>sfp</i>                              | Mutant of <i>B. velezensis</i> SQR9, Δ <i>sfp</i> , (Cm <sup>R</sup><br>Zeo <sup>R</sup> )        | (42)             |
| Δ <i>degU</i>                             | Mutant of <i>B. velezensis</i> SQR9, Δ <i>degU</i> ,<br>(Cm <sup>R</sup> )                        | (20)             |
| Δ <i>spo0A</i>                            | Mutant of <i>B. velezensis</i> SQR9, Δ <i>spo0A</i> ,<br>(Cm <sup>R</sup> Zeo <sup>R</sup> )      | This study       |
| C-Δ <i>spo0A</i>                          | <i>B. velezensis</i> SQR9 <i>spo0A</i> ::cm,<br><i>amyE</i> ::P <sub>43</sub> - <i>spo0A</i> ::em | This study       |

---

628

629

630

631

632

633 **Figure legends:**

634 Figure 1. Different candidate gene deletions of *B. velezensis* SQR9 showed varied  
635 multicellular swarming phenotypes with wild-type *B. velezensis* FZB42. Results are  
636 representative of three experiments. For each photograph, *B. velezensis* SQR9 or its  
637 derivative strains were spotted on the surface of the swarming agar (B-medium) at similar  
638 distance apart, with either wild type *B. velezensis* FZB42 or SQR9 spotted on the lower  
639 portion of plates.

640 Figure 2. Pellicle biofilm formation and cucumber root colonization by monoculture and  
641 co-culture of *Bacillus* strains. SQR9 and FZB42 indicate wild type *B. velezensis* SQR9  
642 and FZB42, respectively, and *spo0A* indicates the *spo0A* mutant of *B. velezensis* SQR9.  
643 (A) Floating pellicle formation by monoculture and co-culture of *Bacillus* strains. (B) and  
644 (C), OD<sub>600</sub> of solubilized crystal violet from the microtiter plate assay at 24 and 48 hours,  
645 respectively. (D) and (E), the *Bacillus* populations of monoculture and co-culture  
646 colonizing cucumber seeding roots at 2 and 4 day time points. For co-culture treatments  
647 in B, C, D and E, the ratio of dark grey (SQR9 or *spo0A* mutant) and light blue (FZB42)  
648 indicate the proportion of different cells in the population, dark grey represents the cells  
649 of strain SQR9 or its *spo0A* mutant, light blue represents the cells of FZB42 wild type.  
650 Error bars indicate the standard deviations from the results from six independent  
651 experiments. Different letters above the bars indicate significant differences ( $p < 0.05$ ).

652 Figure 3. Distance between the fungal mycelium (*F. oxysporum*) and the wall of oxford  
653 cup filled with the supernatants of monoculture or co-culture of *Bacillus* strains. Error  
654 bars indicate the standard deviations from the results from six independent experiments.  
655 SQR9 and FZB42 indicate wild type *B. velezensis* SQR9 and FZB42, respectively, and  
656 *spo0A* indicates *spo0A* mutant of *B. velezensis* SQR9. Different letters above the bars  
657 indicate significant differences ( $p < 0.05$ ).

658 Figure 4. Reversed-phase HPLC chromatograms of lipopeptides (bacillomycin D and  
659 fengycin) produced by monoculture and co-culture of *Bacillus* strains. For the better  
660 comparison, we used liquid chromatographic peaks of lipopeptides produced by *B.*  
661 *velezensis* FZB42 as internal reference (red lines). Liquid chromatographic peaks in black  
662 indicate different samples: A, lipopeptides produced by *B. velezensis* SQR9; B: lipopeptides  
663 produced by co-culture of *B. velezensis* SQR9 and FZB42; C: lipopeptides produced by  
664 *spo0A* mutant of *B. velezensis* SQR9; D: lipopeptides produced by co-culture of *B.*  
665 *velezensis* SQR9 $\Delta$ *spo0A* and wild type FZB42.

666 Figure 5. Production of IAA and acetoin in monoculture and co-culture of *Bacillus* strains.  
667 (A) and (C), IAA production of monoculture and co-culture of *Bacillus* strains was  
668 determined at 24 and 48 hours, respectively. (B) and (D), acetoin production in  
669 monoculture and co-culture of *Bacillus* strains at 24 and 48 hours' time points,  
670 respectively. Error bars indicate the standard deviations from the results from six  
671 independent experiments. SQR9 and FZB42 indicate wild type *B. velezensis* SQR9 and  
672 FZB42, respectively, and *spo0A* indicates *spo0A* mutant of *B. velezensis* SQR9. Different  
673 letters above the bars indicate significant differences ( $p < 0.05$ ).

674 Figure 6. Greenhouse experiment indicated that combined used of SQR9 $\Delta$ *spo0A* and  
675 FZB42 significantly improved the growth of cucumber under FOC pathogen (*F.*  
676 *oxysporum*) stress. SQR9 and FZB42 indicate wild type *B. velezensis* SQR9 and FZB42,  
677 respectively, and *spo0A* indicates *spo0A* mutant of *B. velezensis* SQR9. (A)  
678 Representative images of the cucumber plants inoculated with monoculture and co-  
679 culture of *Bacillus* strains before harvest. (B) and (C) show the effect of different  
680 treatments on cucumber plant height and shoot dry weight, respectively. (D) *Bacillus*  
681 populations of monoculture and co-culture colonizing cucumber roots after harvest. For  
682 co-culture treatments (SQR9+FZB42+FOC and *spo0A*+FZB42+FOC), the ratio of dark  
683 grey (SQR9 or *spo0A* mutant) and light blue (FZB42) indicate the proportion of different  
684 cells in the population, dark grey represents the cells of SQR9 or its *spo0A* mutant, light  
685 blue represents the cells of FZB42. Error bars indicate the standard deviations from the  
686 results from six independent experiments. Different letters above the bars indicate  
687 significant differences ( $p < 0.05$ ).

688 Figure S1. Growth curves of *B. velezensis* FZB42, *B. velezensis* SQR9 and its mutants  
689 strains in liquid MSgg medium.

690 Figure S2. Representative images of distance between the fungal mycelium (*F.*  
691 *oxysporum*) and the wall of oxford cup filled with the supernatants of monoculture or co-  
692 culture of *Bacillus* strains. SQR9 and FZB42 indicate wild type *B. velezensis* SQR9 and  
693 FZB42, respectively, and *spo0A* indicates *spo0A* mutant of *B. velezensis* SQR9. The  
694 solvent control is methanol.



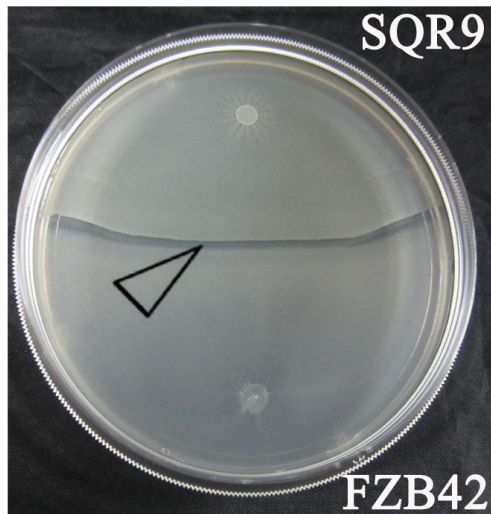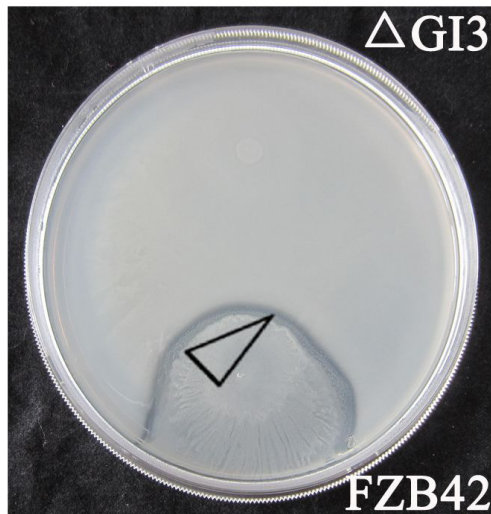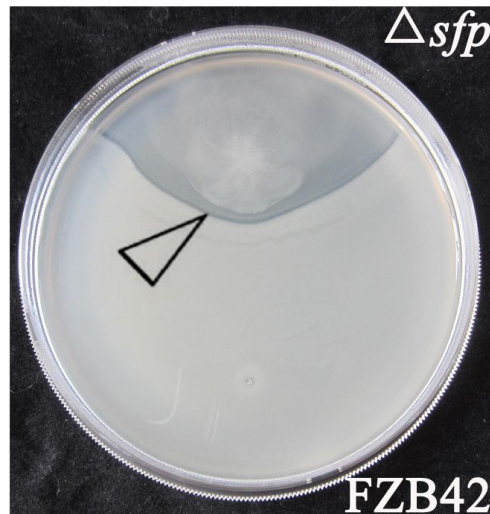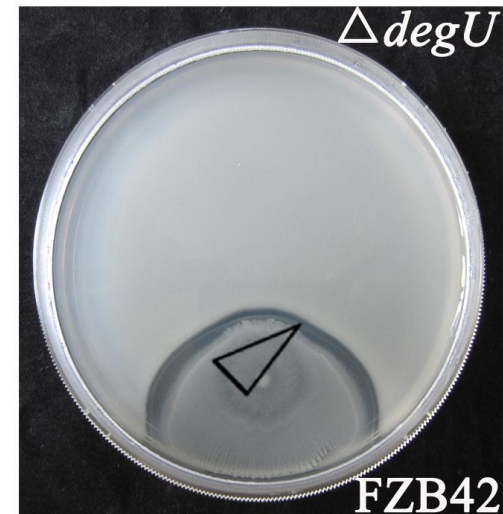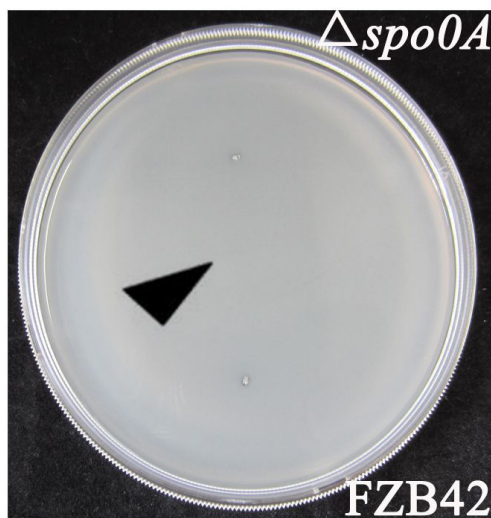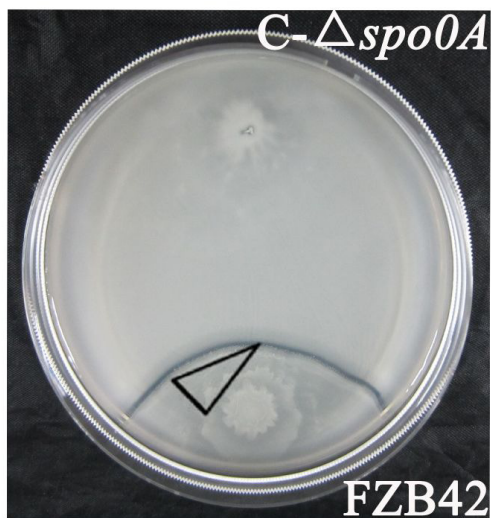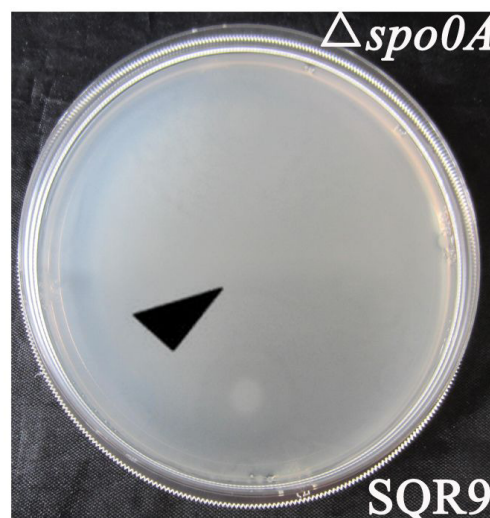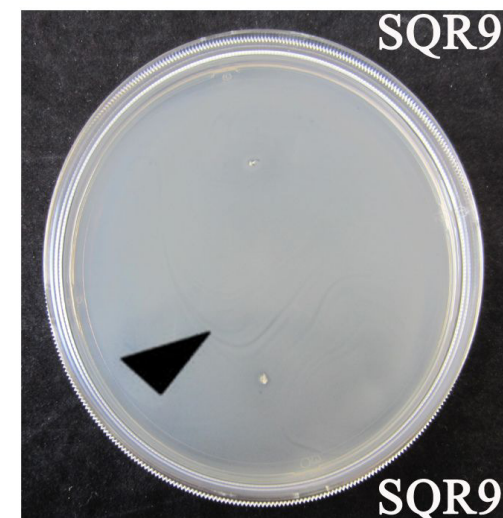

▲ Merge

△ Boundary

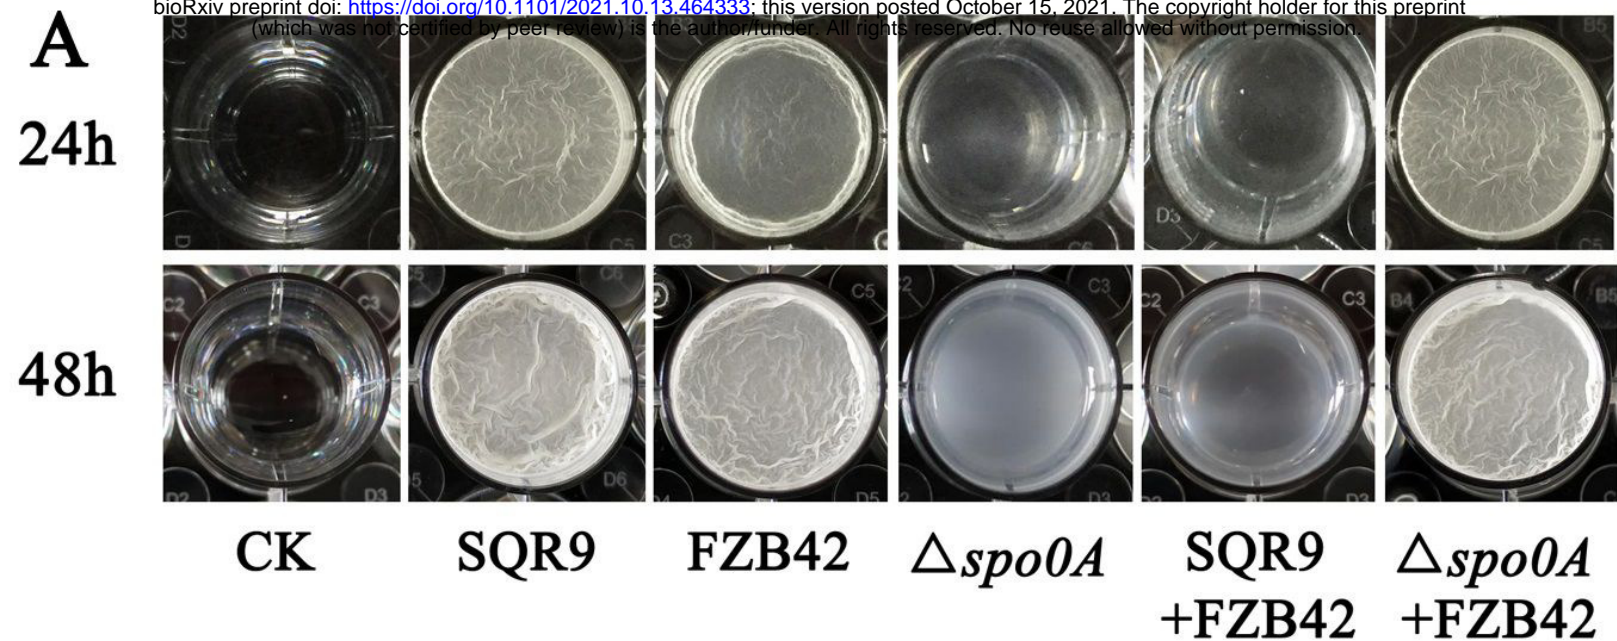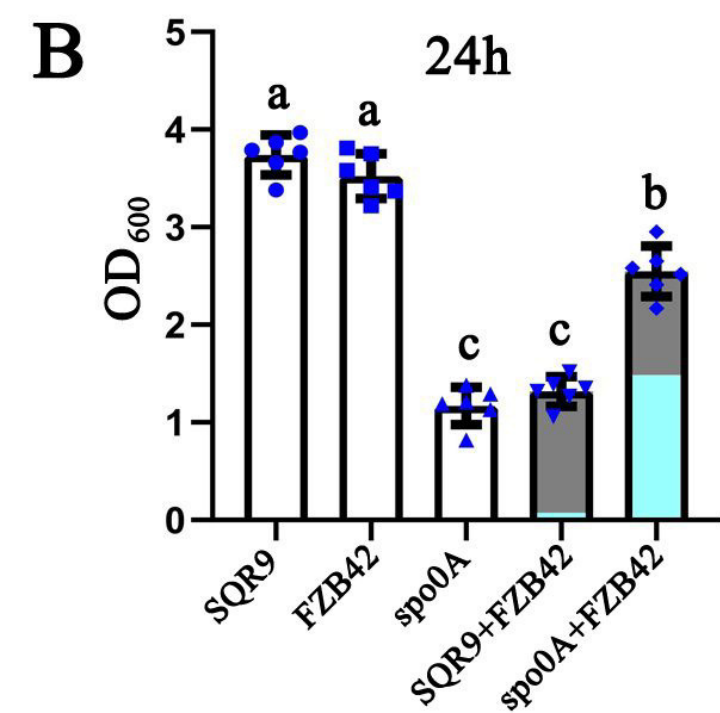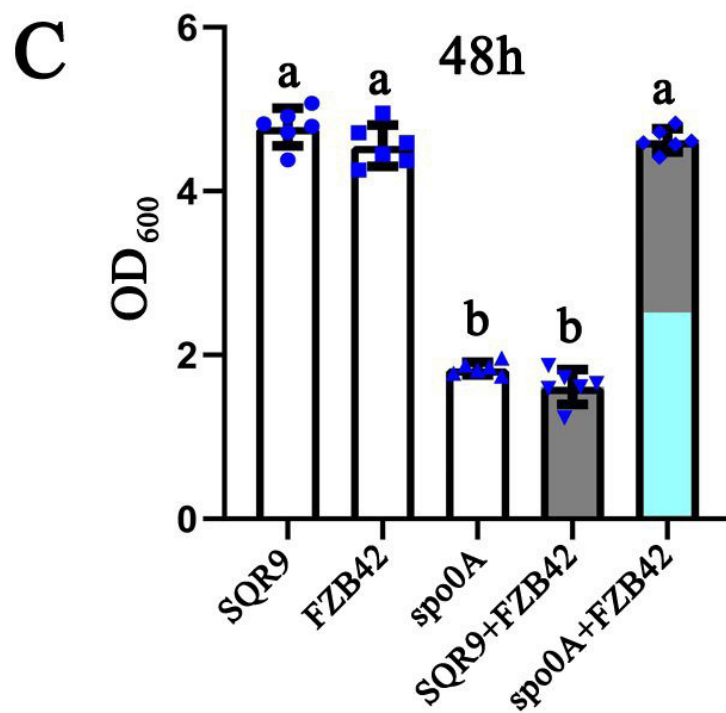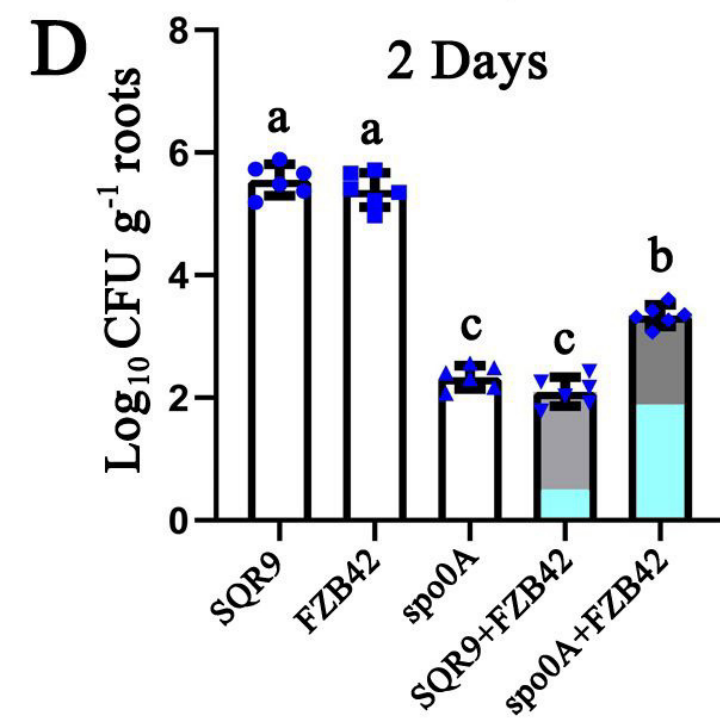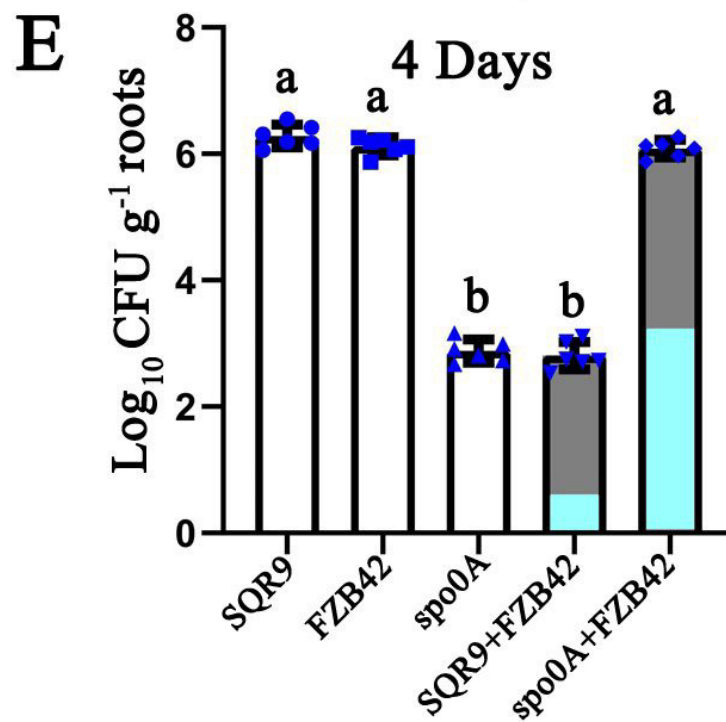



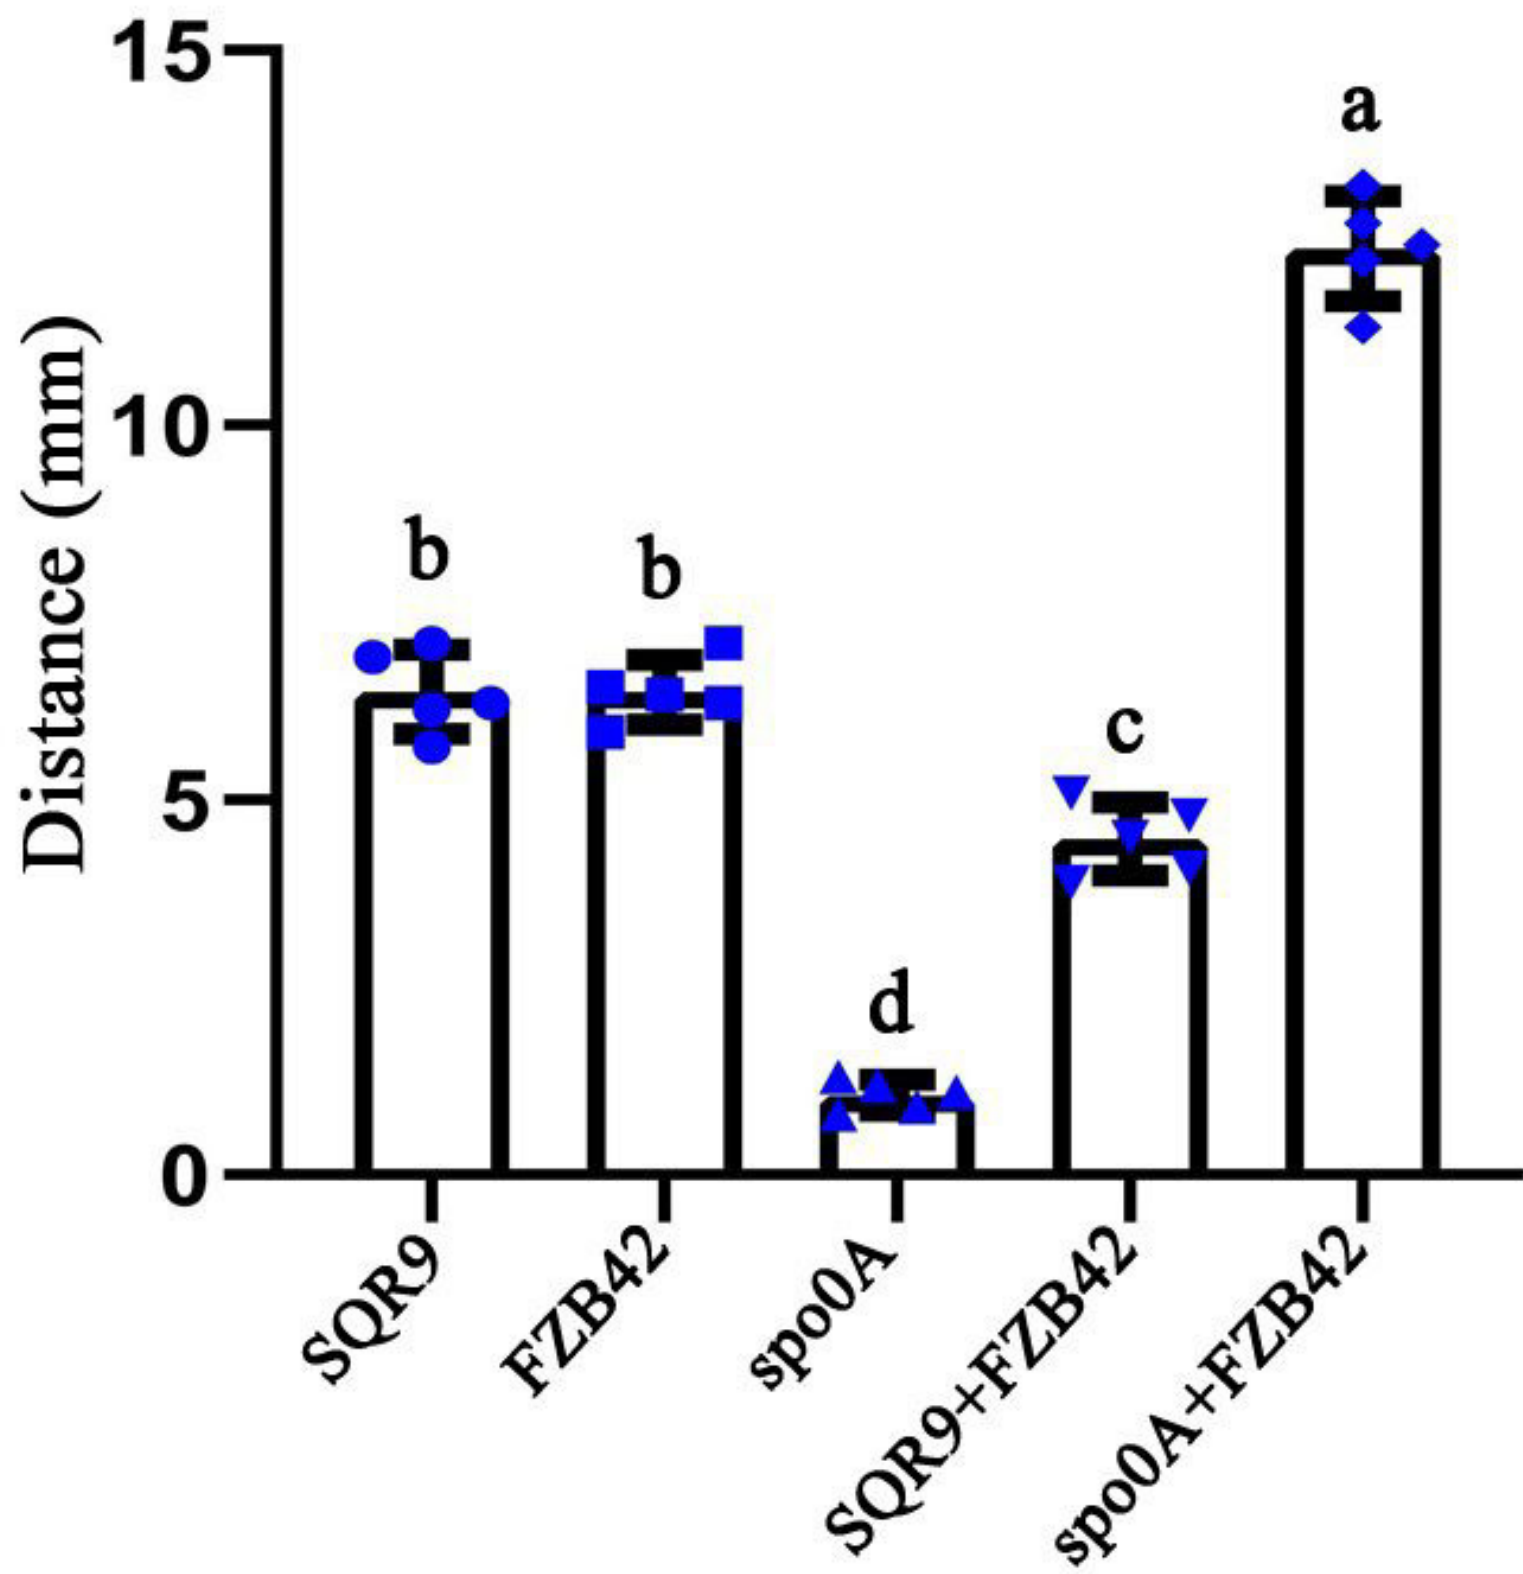



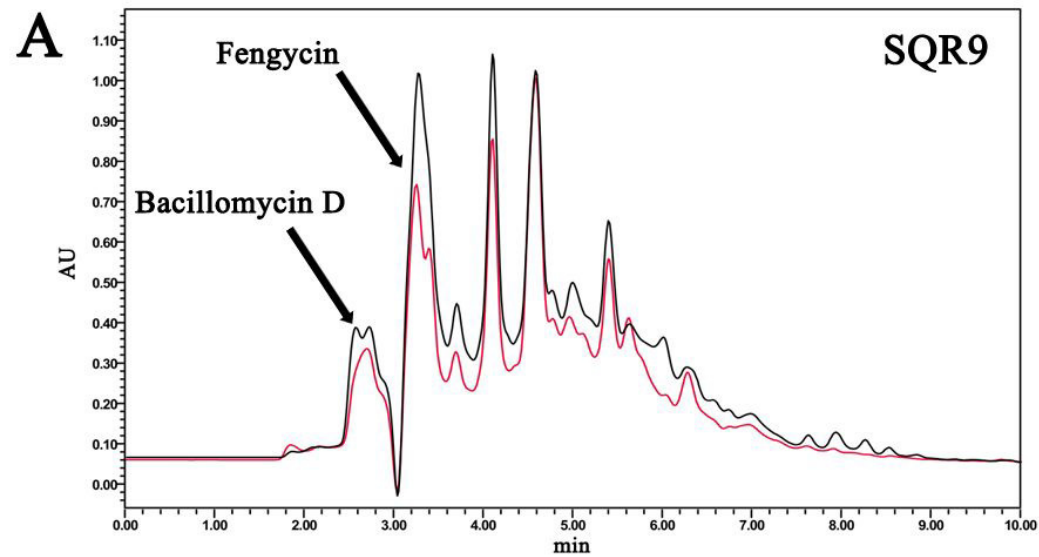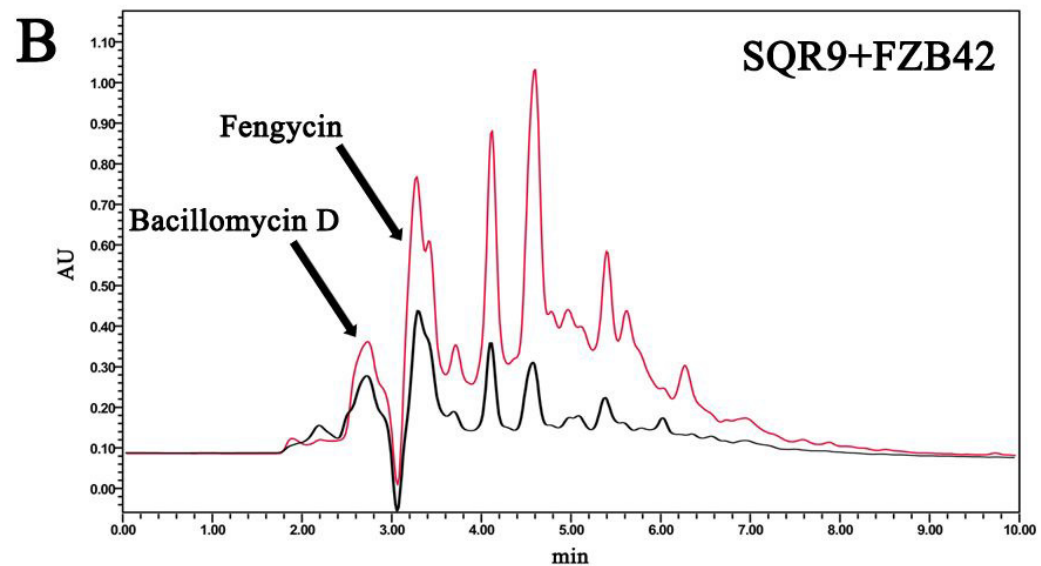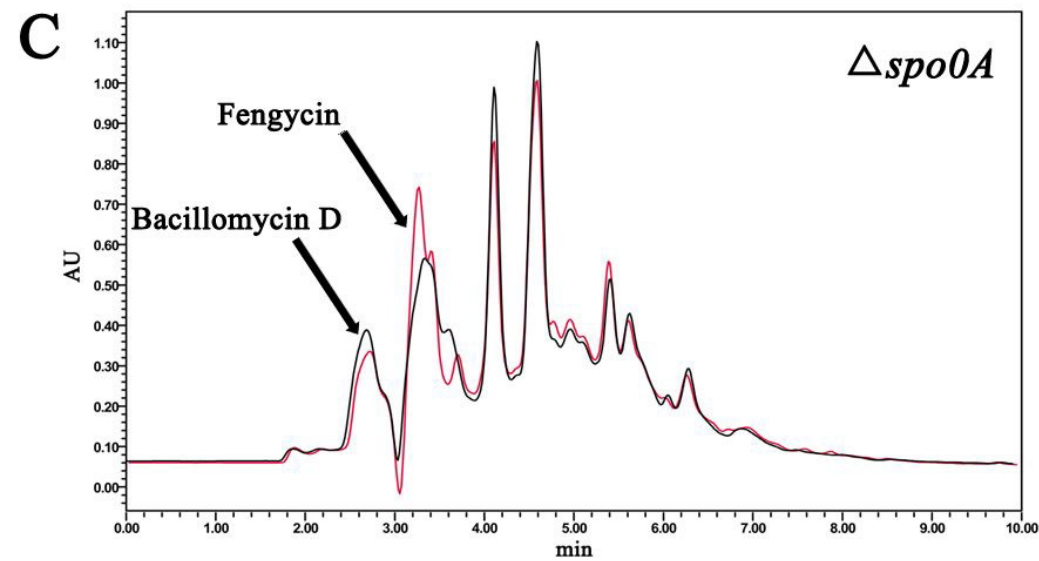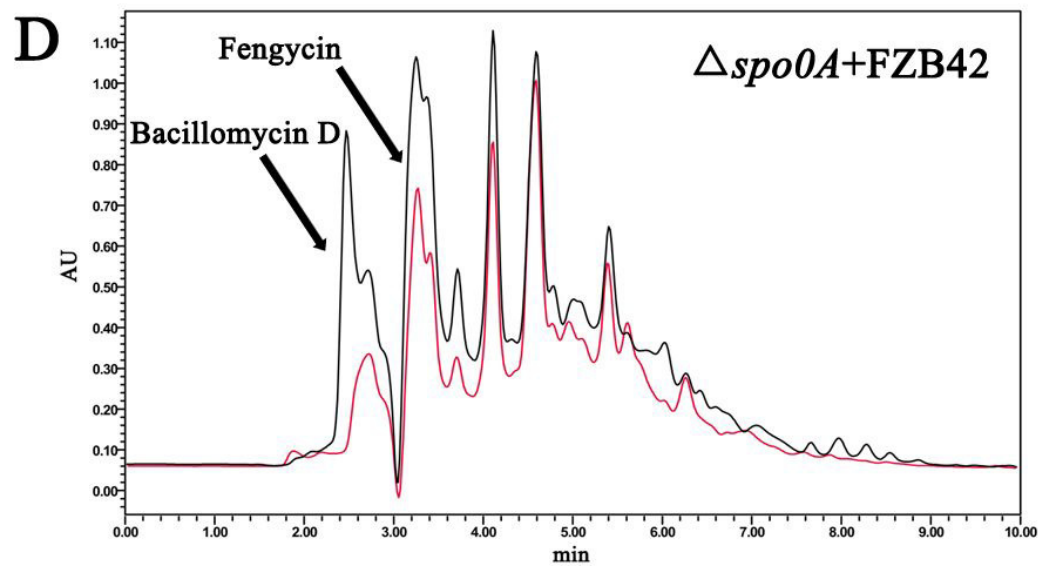

### IAA production

### Acetoin production

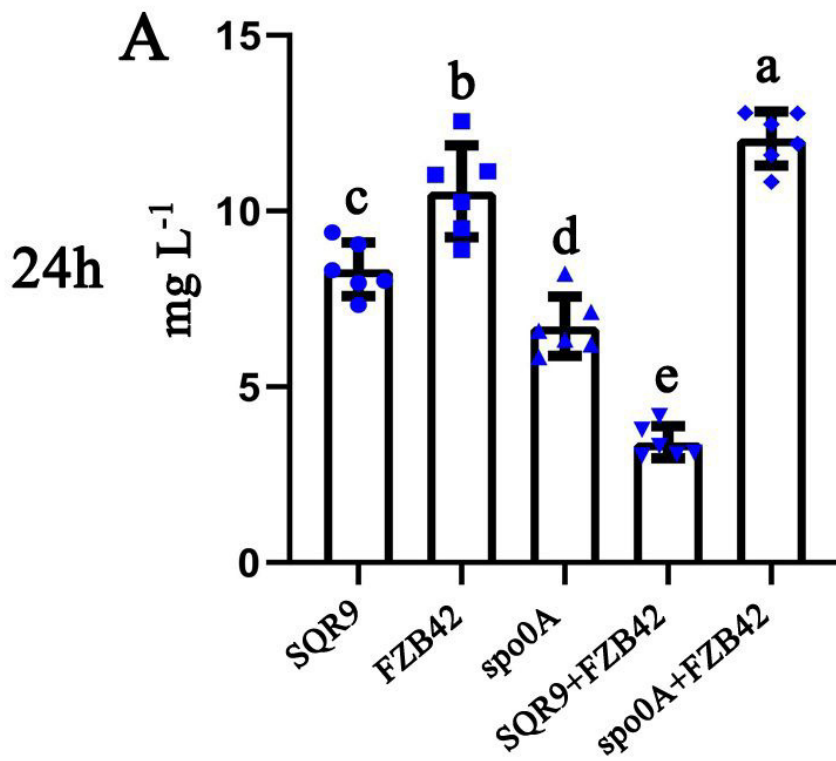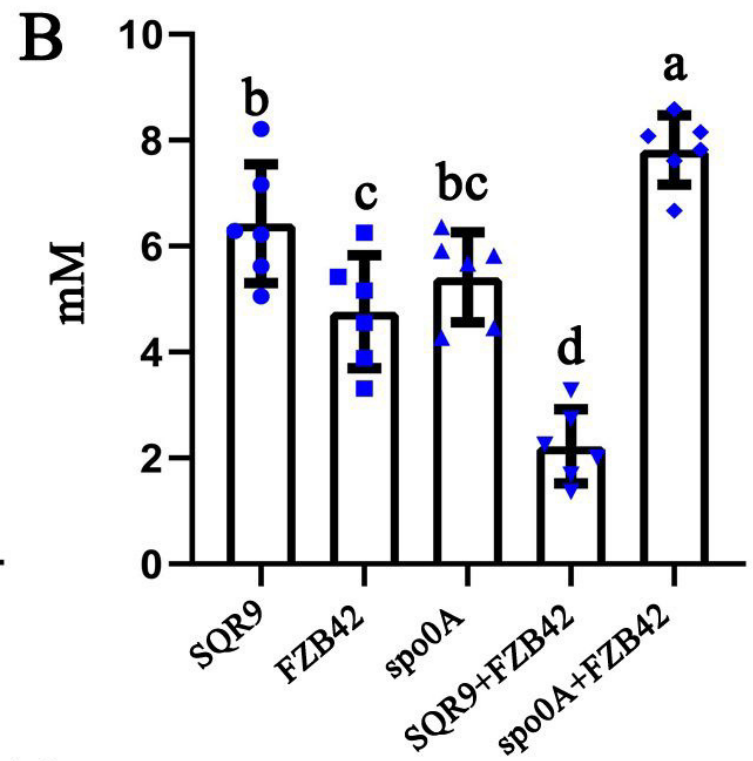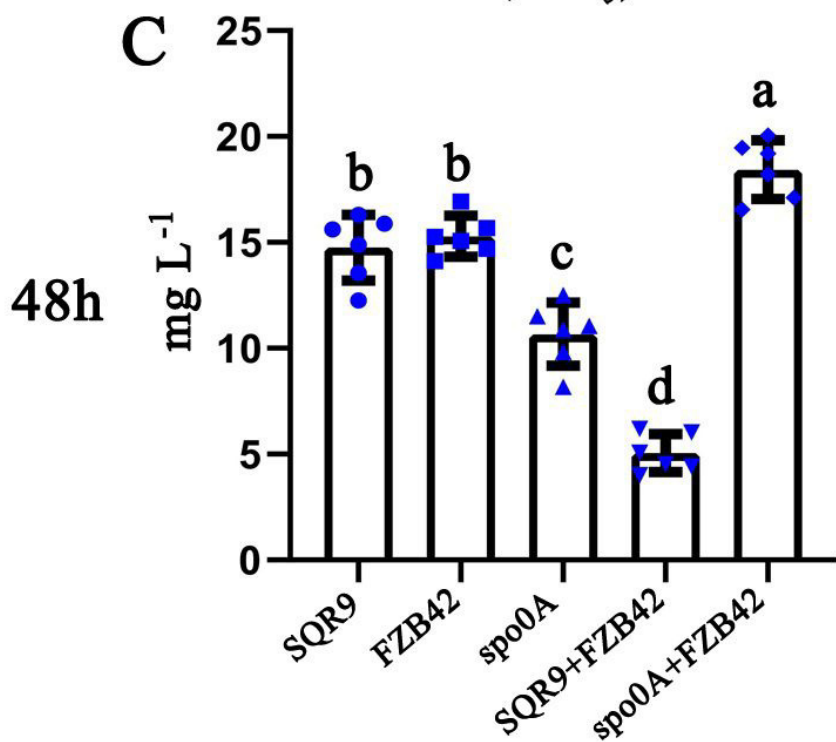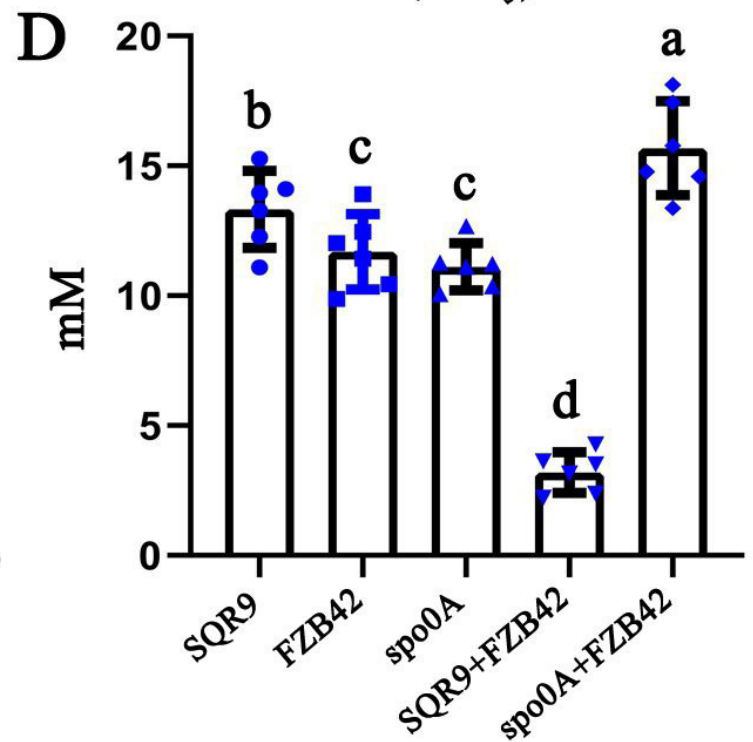

**A**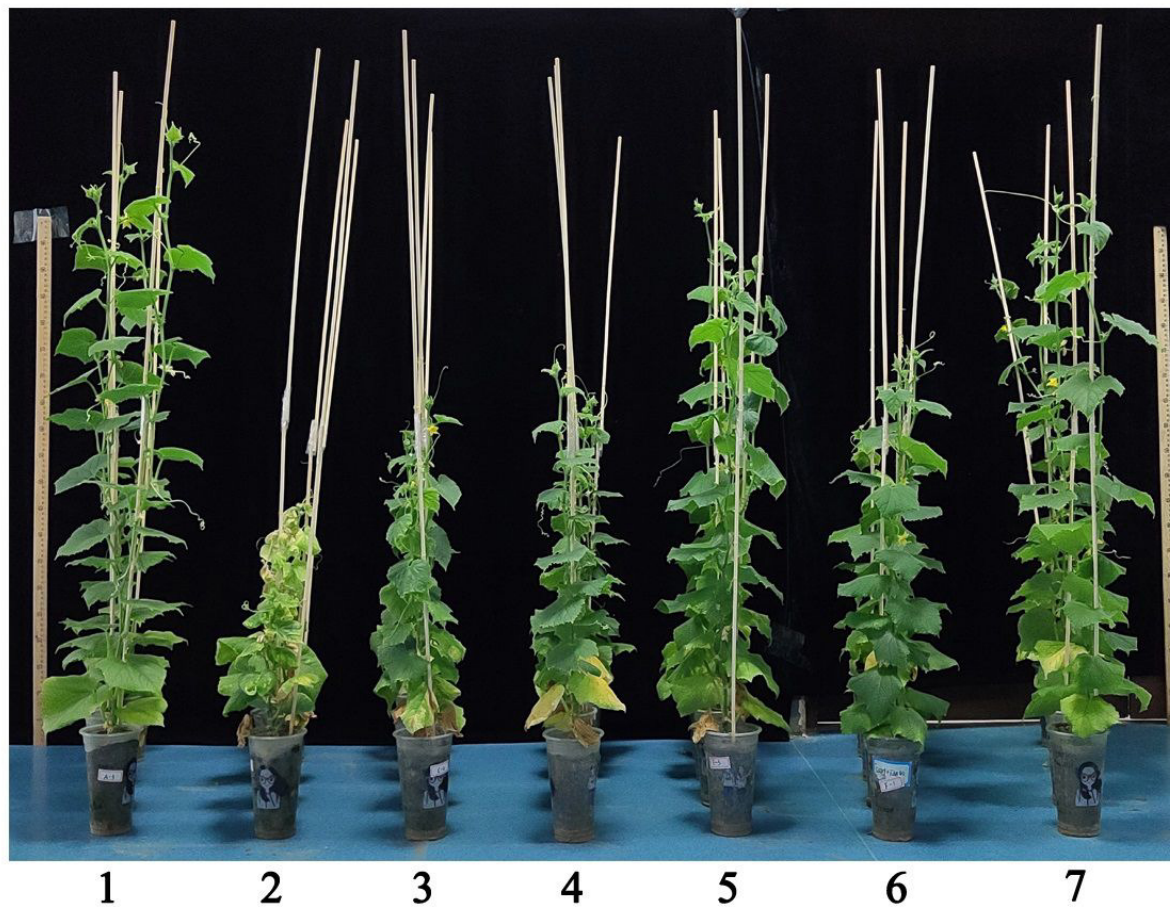

- 1 CK (control)
- 2 FOC
- 3 *spo0A*+FOC
- 4 SQR9+FZB42+FOC
- 5 SQR9+FOC
- 6 FZB42+FOC
- 7 *spo0A*+FZB42+FOC

**B**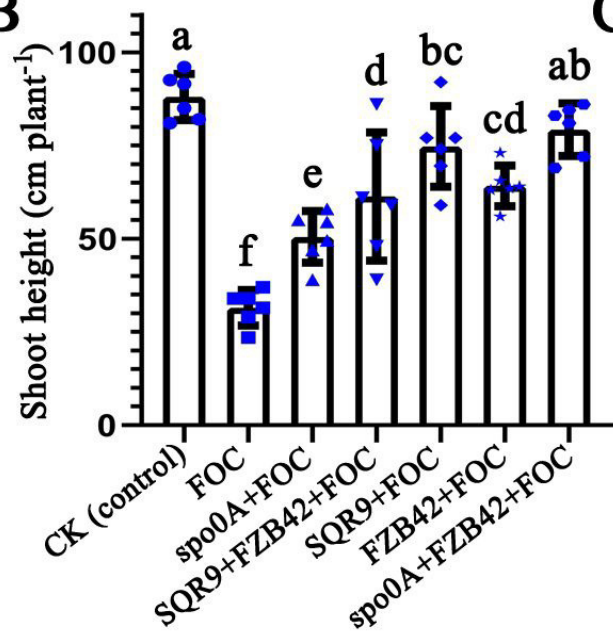**C**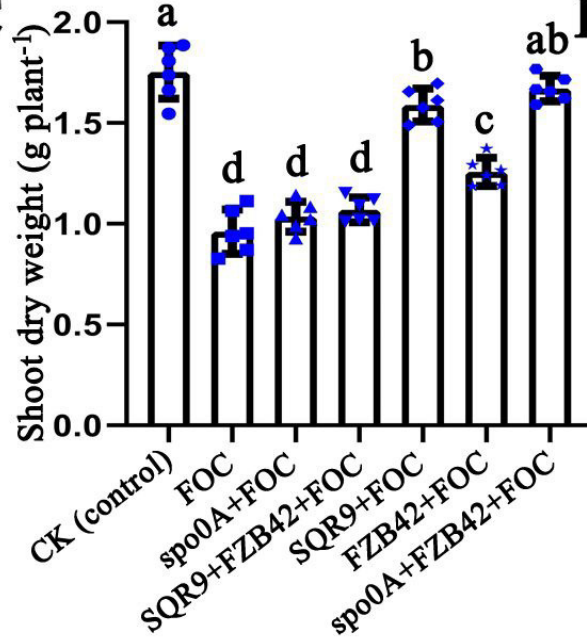**D**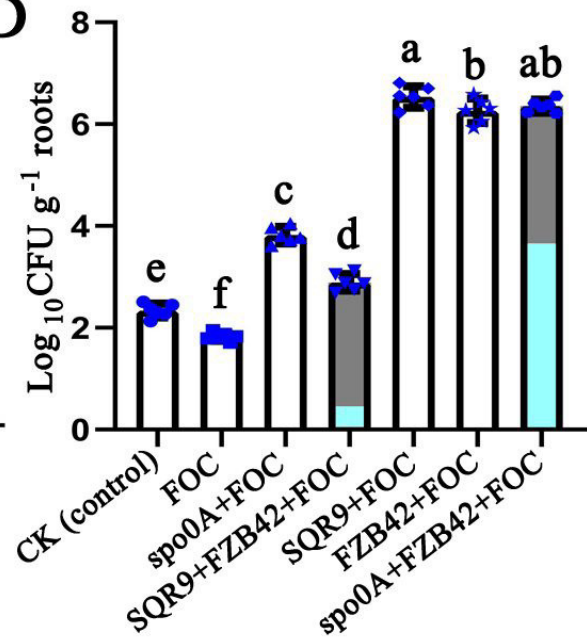

Source: https://www.biorxiv.org/content/biorxiv/early/2021/10/15/2021.10.13.464333.full.pdf
